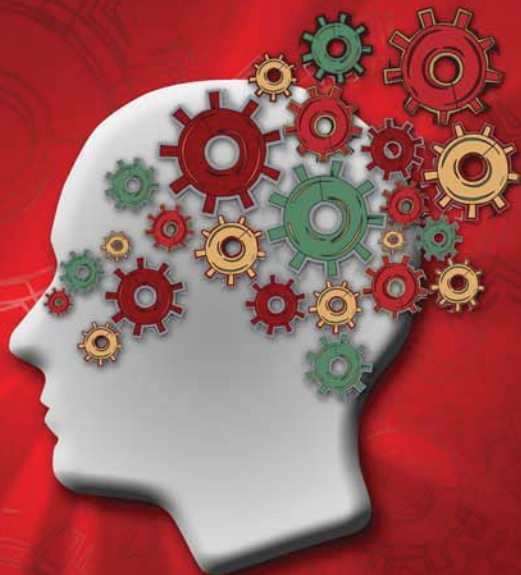

# ADHD FAQ'S:

Practical Answers for the  
Office-Based Practitioner

**APA 2009 Annual Meeting • San Francisco, California**  
**Monday, May 18, 2009 • Marriott-San Francisco, Salons 7/8**

**Breakfast**

6:30 AM–7:00 AM

**Scientific Session**

7:00 AM–9:00 AM

**Welcome and Preactivity Educational Outcomes Measurement**

7:00 AM–7:05 AM Gabriel Kaplan, MD

**How Do I Identify and Treat Adult ADHD?**

7:05 AM–7:25 AM Gabriel Kaplan, MD

**Cardiovascular Effects of Stimulants—Is There Cause for Concern?**

7:25 AM–7:45 AM Donald E. Greydanus, MD

**How Do I Approach the Bipolar vs ADHD Issue?**

7:45 AM–8:05 AM Jeffrey H. Newcorn, MD

**How Do I Manage the ADHD/SUD Comorbidity?**

8:05 AM–8:25 AM Iliyan Ivanov, MD

**Postactivity Measurement**

8:25 AM–8:30 AM Gabriel Kaplan, MD

**Discussion, Q&A**

8:30 AM–9:00 AM Gabriel Kaplan, MD and Faculty

*The American Psychiatric Association (APA) is accredited by the Accreditation Council for Continuing Medical Education to provide continuing medical education for physicians.*

The APA designates this educational activity for a maximum of 2 AMA PRA Category 1 Credits™. Physicians should only claim credit commensurate with the extent of their participation in the activity.

**Learning Objective**

At the conclusion of this session, the participant should be able to enumerate adult ADHD criteria, and understand the cardiovascular risks of stimulants, the process of ADHD/bipolar differential diagnosis, and the outcome findings of ADHD/SUD comorbidity.

*Attendees must be registered for the APA Annual Meeting to attend this symposium. Seating is limited and will be based on first-come, first-served. For more information about the meetings, please visit the APA web site at [www.psych.org](http://www.psych.org) or contact the APA toll free at 1-888-357-7924 (within the U.S. or Canada) or 703-907-7300.*

Registered conference participants and registered guests may attend any industry-supported symposium at the APA meeting.

**Program Chair**

**Gabriel Kaplan, MD**

Clinical Associate Professor  
of Psychiatry  
University of Medicine and Dentistry  
of New Jersey  
Newark, New Jersey  
Executive Director, Psychiatry  
Hoboken University Medical Center  
Hoboken, New Jersey

**Distinguished Faculty**

**Donald E. Greydanus, MD**

Pediatrics Program Director  
MSU/Kalamazoo Center for  
Medical Studies  
Kalamazoo, Michigan

**Iliyan Ivanov, MD**

Assistant Professor, Psychiatry  
Mt Sinai School of Medicine  
New York, New York

**Jeffrey H. Newcorn, MD**

Associate Professor, Psychiatry and  
Pediatrics  
Mount Sinai School of Medicine  
New York, New York

Sponsored by

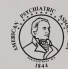

Supported by an  
educational grant from

**Shire**

2009 Annual Meeting sponsored by  
the American Psychiatric Association

# Effective Treatment of Alzheimer's Disease

# Translating Guidelines into Practice

An Interactive Panel Discussion

**Sunday, May 17, 2009**

12:00–12:30 PM Lunch

12:30–2:30 PM Symposium

San Francisco Marriott  
Salon 7/8, Lower B-2 Level  
55 Fourth Street  
San Francisco, California

## Faculty/Presenters

### **George T. Grossberg, MD (Chair)**

Samuel W. Fordyce Professor  
Director, Geriatric Psychiatry  
Department of Neurology and Psychiatry  
Saint Louis University School of Medicine  
St. Louis, Missouri

### **Charles A. Cefalu, MD, MS**

Professor and Chief, Section of Geriatric Medicine  
Department of Medicine  
Louisiana State University Health Sciences Center  
and School of Medicine at New Orleans  
New Orleans, Louisiana

### **Martin R. Farlow, MD**

Professor and Vice Chairman for Research  
Department of Neurology  
Associate Director, Indiana Alzheimer Disease Center  
Indiana University School of Medicine  
Indianapolis, Indiana

### **Wm Maurice Redden, MD**

Geriatric Psychiatry Fellow  
Department of Neurology and Psychiatry  
Saint Louis University School of Medicine  
St. Louis, Missouri

### **Gary W. Small, MD**

Parlow-Solomon Professor on Aging  
Professor of Psychiatry and Biobehavioral Sciences  
David Geffen School of Medicine  
University of California, Los Angeles (UCLA)  
Director, UCLA Center on Aging  
Director, Memory and Aging Research Center  
Semel Institute for Neuroscience and Human Behavior  
Los Angeles, California

## Agenda

12:00–12:30 PM Lunch

12:30–12:45 PM Introduction/Welcome

**George T. Grossberg, MD**

12:45–1:00 PM *The Clinical Pharmacology of Approved AD Therapies*

**Wm Maurice Redden, MD**

1:00–1:15 PM *The Psychiatry Point of View: The AAGP and APA Guidelines for Pharmacologic Management of Patients With AD*

**Gary W. Small, MD**

1:15–1:30 PM *The Neurology Point of View: The AAN Guidelines for Pharmacologic Management of Patients With AD*

**Martin R. Farlow, MD**

1:30–1:45 PM *The General Practitioner Point of View: The ACP/AAFP Guidelines for Pharmacologic Management of Patients With AD*

**Charles A. Cefalu, MD, MS**

1:45–2:25 PM *Moderated Debate and Question & Answer Session*

2:25–2:30 PM *Closing Remarks*

**George T. Grossberg, MD**

## Learning Objectives

At the end of this activity, participants should be able to

1. Evaluate and contrast pharmacologic therapies available for treating patients with Alzheimer's disease (AD)
2. Appraise and contrast the published guidelines for pharmacologic management of patients with AD
3. Have increased confidence in the pharmacologic and nonpharmacologic management of patients with AD

## Accreditation and Credit Designation Statements

The American Psychiatric Association (APA) is accredited by the Accreditation Council for Continuing Medical Education to provide continuing medical education for physicians.

The APA designates this educational activity of a maximum of 2 *AMA PRA Category 1 Credits*<sup>™</sup>. Physicians should only claim credit commensurate with the extent of their participation in the activity.

Attendees must be registered for the APA Annual Meeting to attend this symposium. Seating is limited and will be based on first-come, first-served. For more information about the meeting, please visit the APA Web site at [www.psych.org](http://www.psych.org) or contact the APA toll free at 1-888-357-7924 (within the United States or Canada) or 1-703-907-7300.

Registered conference participants and registered guests may attend any industry-supported symposium at the APA meeting.

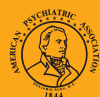

Sponsored by  
the American Psychiatric Association.

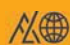

Forest Laboratories, Inc.

Supported by an educational grant from  
Forest Laboratories, Inc.

APA 2009 Annual Meeting in San Francisco, CA

# Development of New Agents for the Treatment of Schizophrenia

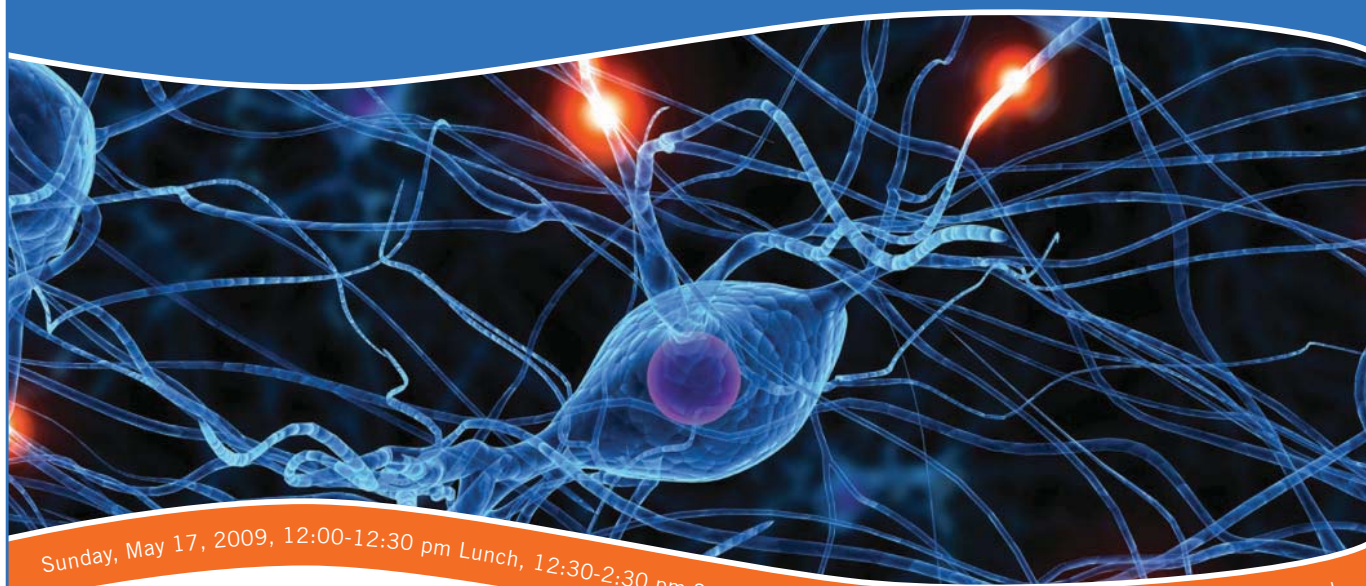

Sunday, May 17, 2009, 12:00-12:30 pm Lunch, 12:30-2:30 pm Symposium, Grand Ballroom, Salon B, Hilton-San Francisco Hotel

## Learning Objectives

After participating in this symposium, participants should be able to:

- Recognize unmet needs in the treatment of schizophrenia and the development of new agents aimed at these needs
- Identify barriers to the rapid development and approval of new agents
- Discuss potential drug development targets to improve cognition in patients with schizophrenia

## Accreditation Statement

The American Psychiatric Association (APA) is accredited by the Accreditation Council for Continuing Medical Education to provide continuing medical education for physicians.

## Credit Designation

The APA designates this educational activity for a maximum of 2 *AMA PRA Category 1 Credits™*. Physicians should only claim credit commensurate with the extent of their participation in the activity.

## Registration

Attendees must be registered for the APA Annual Meeting to attend this symposium. Seating is limited and will be based on first-come, first-served. For more information about the meeting, please visit the APA website at [www.psych.org](http://www.psych.org) or contact the APA toll-free at 1-888-357-7924 (within the U.S. or Canada) or 703-907-7300.

## Agenda

|                       |                                                                                                                                                |
|-----------------------|------------------------------------------------------------------------------------------------------------------------------------------------|
| <b>12:00-12:30 pm</b> | <b>Lunch</b>                                                                                                                                   |
| <b>12:30-12:40 pm</b> | <b>Welcome and Introduction</b><br>Steven G. Potkin, MD (Chair)<br>University of California, Irvine                                            |
| <b>12:40-1:00 pm</b>  | <b>Unmet Needs in Schizophrenia</b><br>Adrian Preda, MD<br>University of California, Irvine                                                    |
| <b>1:00-1:20 pm</b>   | <b>Drug Development in Psychiatry:<br/>Issues and Trends</b><br>Amir H. Kalali, MD<br>Quintiles Inc.<br>University of California,<br>San Diego |
| <b>1:20-1:40 pm</b>   | <b>New Targets for Drug<br/>Development</b><br>Philip Harvey, PhD<br>Emory University School<br>of Medicine                                    |
| <b>1:40-2:00 pm</b>   | <b>Late Stage and Recently<br/>Approved Antipsychotic Agents</b><br>Steven G. Potkin, MD<br>University of California, Irvine                   |
| <b>2:00-2:30 pm</b>   | <b>Panel Discussion/Q&amp;A</b>                                                                                                                |

Sponsored by the  
American Psychiatric Association

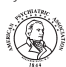

Supported by an educational grant from  
Dainippon Sumitomo Pharma Co., Ltd.

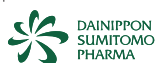

## Credible research

about the most appropriate use for prescription medications *without pharmaceutical industry influence* is now just a click away.

Prescribing for Better Outcomes — a program of The University of North Carolina at Chapel Hill — provides physicians with accurate information about the uses of anti-epileptic drugs in the treatment of bipolar disorder.

[www.PrescribingforBetterOutcomes.org](http://www.PrescribingforBetterOutcomes.org)

 Text "RX" to 54608 to learn more about this program.

 **PRESCRIBING for BETTER OUTCOMES**

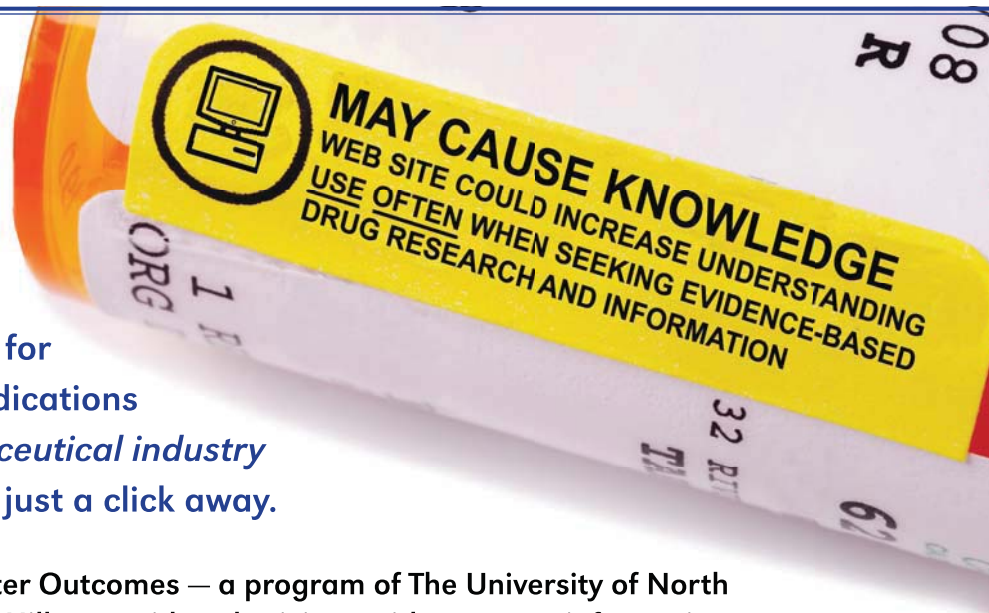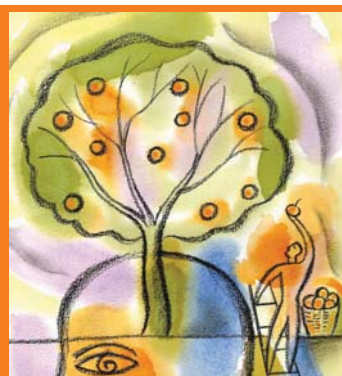

This program will be conducted on May 17, 2009, during the APA 2009 Annual Meeting

## Augmentation STRATEGIES for MAJOR DEPRESSIVE DISORDER:

The Evidence for Effective Clinical Decision-Making in Improving Patient Care

SUNDAY, MAY 17, 2009 • Dinner: 6:30–7:00 PM • Symposium: 7:00–9:00 PM  
San Francisco, California • Yerba Buena Ballroom, Salons 7 & 8 • SAN FRANCISCO MARRIOTT

### AGENDA

- 6:30–7:00 PM Breakfast
- 7:00–7:05 PM Introduction & Overview  
MADHUKAR H. TRIVEDI, MD (Chairperson)  
University of Texas Southwestern Medical Center
- 7:05–7:30 PM Inadequate Treatment Response in Major Depressive Disorder: Predictors and Strategies for Selecting Next-Step Treatments  
ROY H. PERLIS, MD, MSC  
Harvard Medical School
- 7:30–7:55 PM Effective Management of Treatment-Resistant Depression: Evidence-Based Approaches Beyond First-Line Antidepressant Monotherapy  
MADHUKAR H. TRIVEDI, MD
- 7:55–8:20 PM Atypical Antipsychotics as Augmentation Agents for Major Depressive Disorder: Efficacy and Tolerability  
GEORGE I. PAPANASTASIS, MD  
Harvard Medical School
- 8:20–9:00 PM Panel Discussion/Question and Answer Session  
ALL FACULTY

### EDUCATIONAL ACTIVITY LEARNING OBJECTIVES

At the conclusion of this symposium, the participant should be able to:

- Discuss and interpret the clinical implications of factors underlying inadequate response to antidepressant therapy in patients with MDD
- Compare and contrast the rationale for using different second-line strategies in patients who do not respond adequately to antidepressants
- Evaluate the clinical trial evidence for the use of atypical antipsychotics in the management of MDD

### CME STATEMENT

This symposium will be conducted on May 17, 2009, during the APA 2009 Annual Meeting. The American Psychiatric Association (APA) is accredited by the Accreditation Council for Continuing Medical Education to provide continuing medical education for physicians. The APA designates this educational activity for a maximum of 2 *AMA PRA Category 1 Credits*™. Physicians should only claim credit commensurate with the extent of their participation in the activity. Attendees must be registered for the APA Annual Meeting to attend this symposium. Seating is limited and will be based on first-come, first-served. For more information about the meeting, please visit the APA Web site at [www.psych.org](http://www.psych.org) or contact the APA toll free at 1-888-357-7924 (within the US or Canada) or 703-907-7300.

 If any participant of this activity given by The France Foundation is in need of accommodation, please fax written requests to 1-860-434-5390.

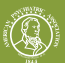

Sponsored by the American Psychiatric Association

GREEN Symposium™

Supported by an educational grant from  
 Bristol-Myers Squibb

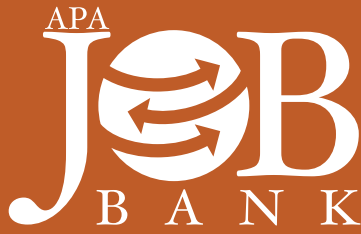

*The best source for psychiatric job placement*

**APA Job Bank**  
[psych.org/jobbank](http://psych.org/jobbank)

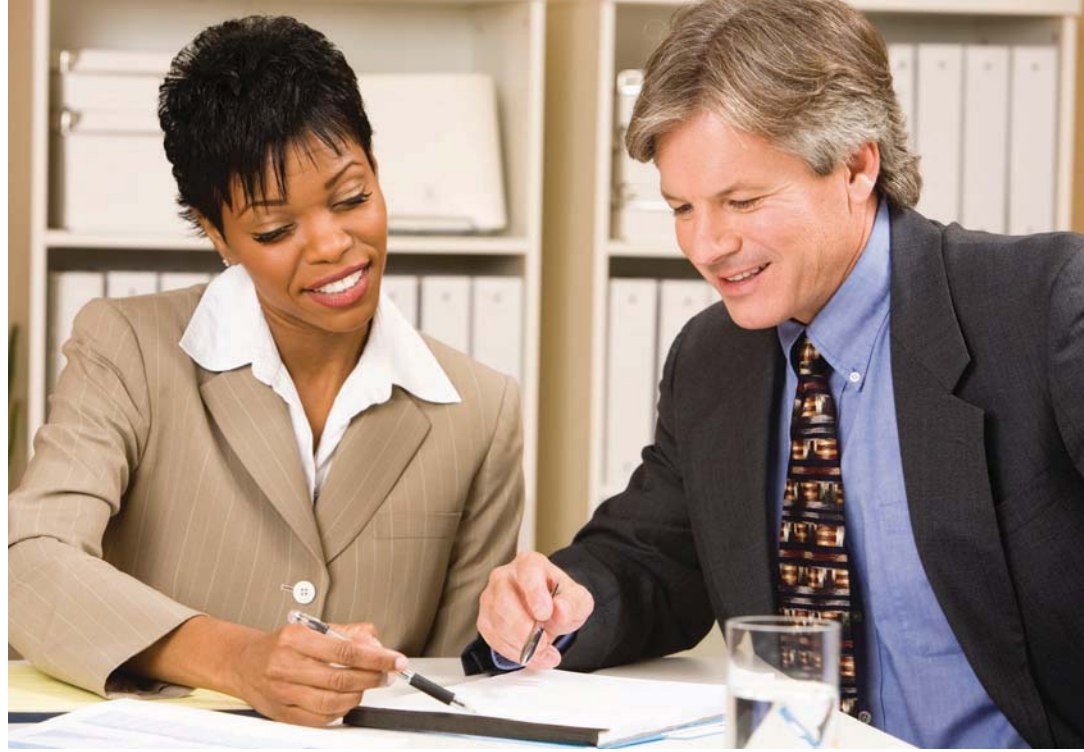

## Candidates and Employers Connect through the APA Job Bank at the APA Annual Meeting

- Visit the APA Job Bank to search the most comprehensive online listing of psychiatric positions.
- Connect with prospective employers at the APA Annual Meeting with the APA Job Bank Conference Connection tool.
- Ask APA Job Bank representatives for a demonstration of site features.
- Visit the APA Job Bank today to find the ideal position!

Located in the APA Member Center, next to registration and at the Career Center in the Exhibit Hall

Saturday, May 16  
10:00 am - 5:00 pm

Sunday, May 17  
10:00 am - 4:30 pm

Monday, May 18  
10:00 am - 5:00 pm

Tuesday, May 19  
10:00 am - 5:00 pm

Wednesday, May 20  
10:00 am - 3:00 pm

# SEE ME FOR WHO I CAN BE

GREG, 35\*

Diner Worker

Diagnosis: Schizophrenia

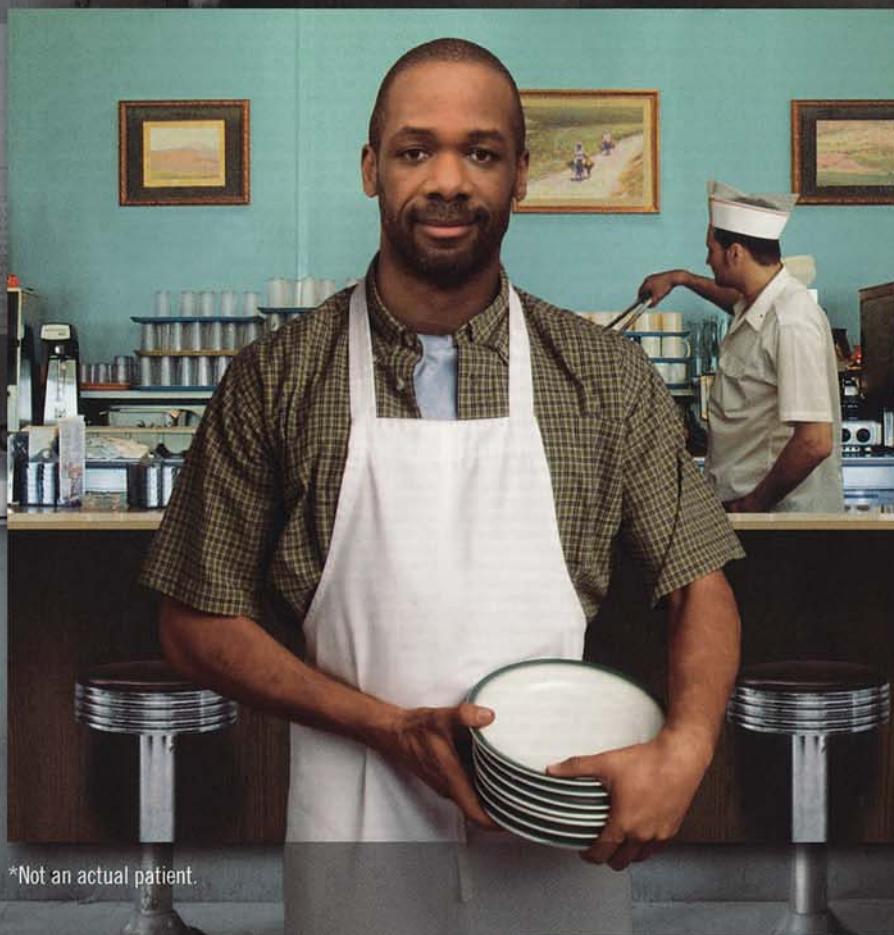

\*Not an actual patient.

## Do you see your patients' full potential?

GEODON is indicated for the treatment of schizophrenia.

Elderly patients with dementia-related psychosis treated with antipsychotic drugs are at an increased risk of death compared to placebo. GEODON is not approved for the treatment of patients with dementia-related psychosis.

GEODON is contraindicated in patients with a known history of QT prolongation, recent acute myocardial infarction, or uncompensated heart failure, and should not be used with certain other QT-prolonging drugs. GEODON has a greater capacity to prolong the QT<sub>c</sub> interval than several antipsychotics. In some drugs, QT prolongation has been associated with torsade de pointes, a potentially fatal arrhythmia. In many cases this would lead to the conclusion that other drugs should be tried first. Hypokalemia may increase the risk of QT prolongation and arrhythmia.

As with all antipsychotic medications, a rare and potentially fatal condition known as neuroleptic malignant syndrome (NMS) has been reported with GEODON. NMS can cause hyperpyrexia, muscle rigidity, diaphoresis, tachycardia, irregular pulse or blood pressure, cardiac dysrhythmia, and altered mental status. If signs and symptoms appear, immediate discontinuation, treatment, and monitoring are recommended.

Prescribing should be consistent with the need to minimize tardive dyskinesia (TD), a potentially irreversible dose- and duration-dependent syndrome. If signs and symptoms appear, discontinuation should be considered since TD may remit partially or completely.

Hyperglycemia-related adverse events, sometimes serious, have been reported in patients treated with atypical antipsychotics. There have been few reports of hyperglycemia or diabetes in patients treated with GEODON, and it is not known if GEODON is associated with these events. Patients treated with an atypical antipsychotic should be monitored for symptoms of hyperglycemia.

Precautions include the risk of rash, orthostatic hypotension, and seizures.

In short-term schizophrenia trials, the most commonly observed adverse events associated with GEODON at an incidence of  $\geq 5\%$  and at least twice the rate of placebo were somnolence and respiratory tract infection.

Please see brief summary of prescribing information on adjacent page.

For more information, please visit [www.pfizerpro.com/GEODON](http://www.pfizerpro.com/GEODON)

**GEODON**<sup>®</sup>  
(ziprasidone HCl) Capsules



# ANXIOUS DEPRESSION: DIAGNOSTIC AND TREATMENT ISSUES

Hilton–San Francisco  
Ballroom 4/5/6

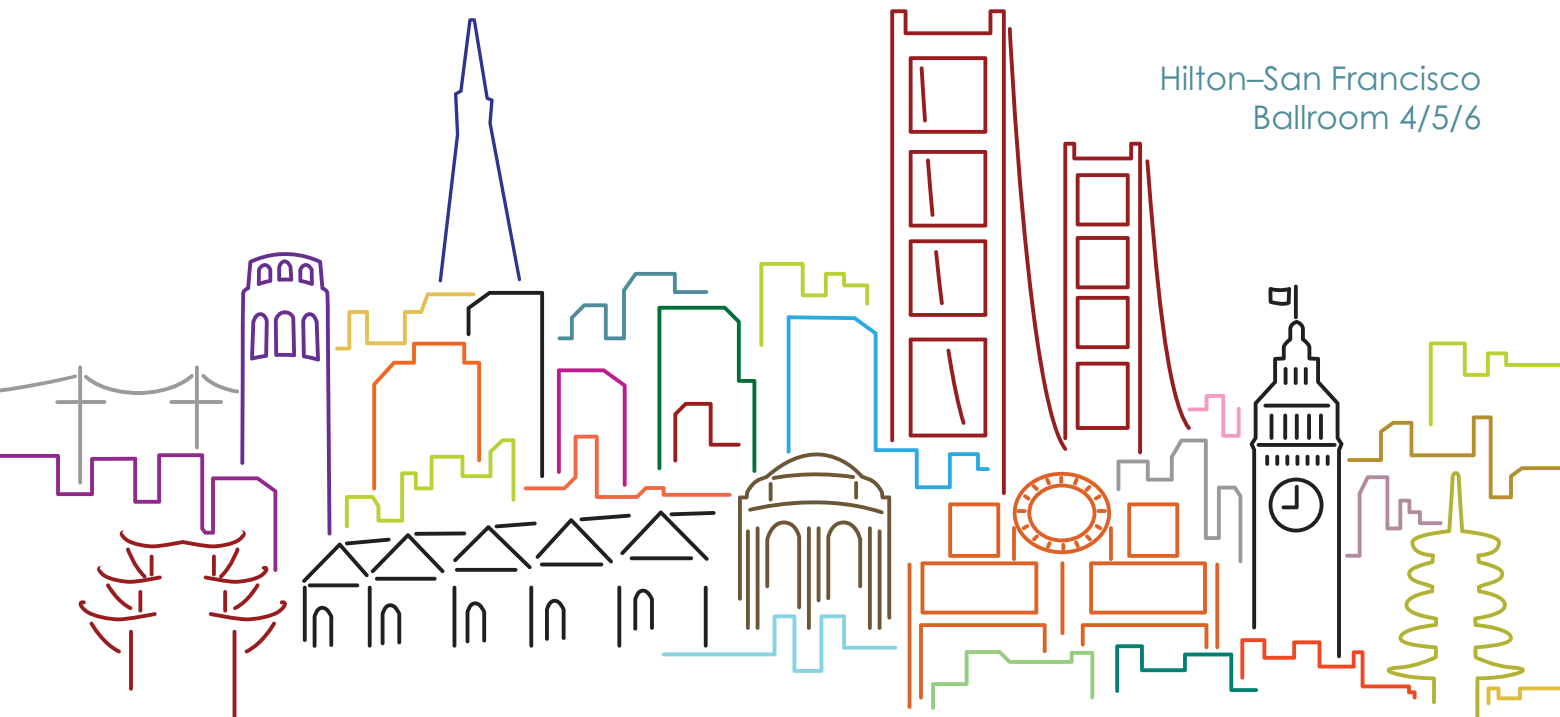

Monday, May 18, 2009 • 6:30-7:00 pm Dinner • 7:00-9:00 pm Symposium

## AGENDA

- 6:30-7:00 pm Dinner  
7:00-7:10 pm **Welcome and Introduction**  
Maurizio Fava, MD (Chair)  
Massachusetts General Hospital
- 7:10-7:30 pm **How Do We Define Anxious Depression?**  
John M. Zajecka, MD  
Rush University Medical Center
- 7:30-7:35 pm Q&A  
7:35-7:55 pm **Neurobiology of Anxious Depression**  
Audrey Tyrka, MD  
Brown Medical School
- 7:55-8:00 pm Q&A  
8:00-8:20 pm **Pharmacotherapeutic Strategies in the Treatment of Anxious Depression**  
Maurizio Fava, MD  
Massachusetts General Hospital
- 8:20-8:25 pm Q&A  
8:25-8:45 pm **Psychotherapeutic Approaches to Anxious Depression**  
Amy Farabaugh, PhD  
Massachusetts General Hospital
- 8:45-8:50 pm Q&A  
8:50-9:00 pm **Panel Discussion/Q&A**

## LEARNING OBJECTIVES

At the conclusion of this symposium, the participant should be able to:

- Differentiate anxious depression from major depression and appreciate the neurobiological and phenomenological differences between these subtypes.
- Diagnose anxious depression in routine clinical practice.
- Develop treatment plans for patients with anxious depression that recognize the importance of psychotherapy in treatment and the typically less robust response to pharmacotherapy.

### Accreditation Statement

The American Psychiatric Association (APA) is accredited by the Accreditation Council for Continuing Medical Education to provide continuing medical education for physicians.

### Credit Designation

The APA designates this educational activity for a maximum of 2 AMA PRA Category 1 Credits™. Physicians should only claim credit commensurate with the extent of their participation in the activity.

### Registration

Attendees must be registered for the APA Annual Meeting to attend this symposium. Seating is limited and will be based on first-come, first-served. For more information about the meeting, please visit the APA website at [www.psych.org](http://www.psych.org) or contact the APA toll-free at 1-888-357-7924 (within the U.S. or Canada) or 703-907-7300.

Sponsored by the  
American Psychiatric Association

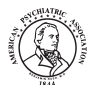

Supported by an educational grant from H. Lundbeck A/S  
and Takeda Pharmaceuticals North America, Inc.

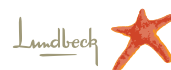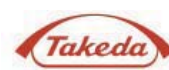



**Osler Institute 138<sup>th</sup> to 141<sup>st</sup>  
Psychiatry Review Courses**  
*approved for AMA/PRA category 1 credit*

**for Written Exams**

September 7-11, 2009 – Kansas City

**for Oral Boards**

1-day oral didactic day

June 8, 2009 – Denver

September 7 – Kansas City

3-day mock oral exams

June 9-11 – Denver

September 8-10, 2009 – Kansas City

**for Child and Adolescent**

November 9-12, 2009 – Baltimore

**New – Best of Psych Audio**

**Call Today: (800) 356-7537**

**www.osler.org**

Y95

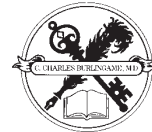

We are pleased to announce that  
**DAVID J. KUPFER, M.D.**  
is the 2009 recipient of the  
**C. CHARLES BURLINGAME, M.D. AWARD**  
for his outstanding contributions to psychiatry.

**Past Recipients**

- 1988 Robert Kellner, M.D., Ph.D.
- 1989 William T. Carpenter, Jr., M.D.
- 1990 Dennis P. Cantwell, M.D.
- 1991 George E. Vaillant, M.D.
- 1992 A. John Rush, M.D.
- 1993 John C. Nemiah, M.D.
- 1994 Maurice J. Martin, M.D.
- 1995 Otto F. Kernberg, M.D.
- 1996 Charles P. O'Brien, M.D., Ph.D.
- 1997 Glen Owen Gabbard, M.D.
- 1998 Lissy F. Jarvik, M.D., Ph.D.
- 1999 Nancy C. Andreasen, M.D., Ph.D.
- 2000 Lewis L. Judd, M.D.
- 2001 Paul S. Appelbaum, M.D.
- 2002 Charles B. Nemeroff, M.D., Ph.D.
- 2003 Dilip V. Jeste, M.D.
- 2004 David H. Barlow, Ph.D.
- 2005 Herbert D. Kleber, M.D.
- 2006 Daniel N. Stern, M.D.
- 2007 Jerrold F. Rosenbaum, M.D.
- 2008 K. Ranga Rama Krishnan, M.D.

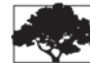

THE  
INSTITUTE  
OF LIVING

HARTFORD HOSPITAL

200 Retreat Avenue, Hartford, CT 06106 • 1-800-673-2411

Visit us at Booth 1109 at  
the APA Annual Meeting.

**EXCLUSIVELY FOR WOMEN WITH BPD**

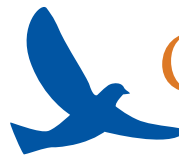

**Gunderson  
Residence**  
of McLean Hospital

The premier residential treatment program  
fosters personal growth and self-reliance in women  
with borderline personality disorder (BPD).

- evidence-based treatment approaches for BPD and other personality disorders
- expertise in co-occurring psychiatric conditions
- close proximity to Boston's academic, occupational and social opportunities promotes independent living

**Call 888.657.5699 or email  
gundersonres@mclean.harvard.edu**

**www.gundersonresidence.org**

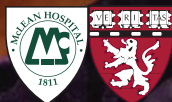

McLean Hospital is the largest psychiatric facility of  
Harvard Medical School, an affiliate of Massachusetts  
General Hospital and a member of Partners HealthCare.

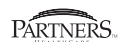

New from

# OXFORD

## NEUROBIOLOGY OF MENTAL ILLNESS

Third Edition

Dennis S. Charney and Eric J. Nestler

This is a new edition of the first comprehensive text to show how the advances in molecular and cellular biology and in the basic neurosciences have brought the revolution in molecular medicine to the field of psychiatry.

2009 1504 pp.; 240 illus.  
9780195325331 cloth \$225.00

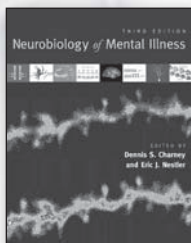

## INTRODUCTION TO NEUROPSYCHOPHARMACOLOGY

Leslie Iversen, Susan D. Iversen, Floyd E. Bloom, and Robert H. Roth

Authored by four founders of modern neuroscience, this concise and comprehensive text covers the current series of medications used to treat diseases of the brain and nervous system—both psychiatric and neurologic—as well as legal and illegal recreational drugs and the neuroscientific information that explains how these medications act on the brain from the molecular to the clinical level.

2009 576 pp.  
9780195380538 paper \$45.00

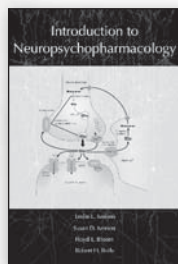

## OXFORD AMERICAN HANDBOOK OF PSYCHIATRY

David Kupfer, Michelle S. Horner, David Brent, David Lewis, Charles Reynolds, Michael Thase, Michael Travis and Michelle X. Horner

This book is a flexi-covered, pocket clinical book, providing practical guidance in quick reference, note form. This new handbook is ideal for students, residents and anyone wanting a succinct, comprehensive, and affordable volume in the proven format of the Oxford Handbook Series.

2008 1260 pp.; 15 illus.  
9780195308846 flexi-cover \$39.95

## CAMPBELL'S PSYCHIATRIC DICTIONARY

Ninth Edition

Robert J. Campbell

The newest edition of a work that has been widely recognized as the definitive dictionary of psychiatry-up-to-date, comprehensive, and authoritative.

2009 1280 pp.  
9780195341591 cloth \$59.95

## PSYCHIATRY IN LONG-TERM CARE

Second Edition

Edited by William E. Reichman and Paul R. Katz

This book comprehensively reviews the present state of knowledge on how to identify the major psychiatric disorders affecting residents of long-term care facilities and how to intervene.

2009 527 pp.  
9780195160949 cloth \$69.95

## PSYCHIATRIC ETHICS

Fourth Edition

Sidney Bloch and Stephen Green

The newest edition of the major, comprehensive text and core reference in the field, covering a range of complex ethical dilemmas that face clinicians and researchers in their everyday practice.

2009 560 pp.; 8 illus.  
9780199234318 paper \$57.50

## NEW OXFORD TEXTBOOK OF PSYCHIATRY

Second Edition

Edited by Michael Gelder, Nancy Andreasen,

Juan Lopez-Ibor and John Geddes

Destined to be used by those in higher training, for continuing education and reaccreditation, and as a specialist's reference, this book will be the one reference work that everyone in the field will want on their shelves.

2009 1,952 pp.  
9780199206698 cloth \$390.00

## OXFORD TEXTBOOK OF SUICIDOLGY

Danuta Wasserman and Camilla Wasserman

Written by world-leading specialists, this book describes all aspects of suicidal behavior and suicide prevention.

2009 620 pp.  
9780198570059 cloth \$150.00

## PRESCRIPTIONS FOR THE MIND

A Critical Review of Contemporary Psychiatry

Joel Paris

2008 272 pp.  
9780195313833 cloth \$29.50

## PSYCHIATRIC ASPECTS OF NEUROLOGIC DISEASES

Practical Approaches to Patient Care

Edited by Constantine G. Lyketsos, Peter V. Rabins,

John P. Lipsay, and Phillip R. Slavney

2008 464 pp.  
9780195309430 cloth \$42.95

To place your order, contact customer service at **1-800-451-7556** or visit us online at [www.oup.com/us](http://www.oup.com/us). Prices are subject to change and apply only in the US.

**OXFORD**  
UNIVERSITY PRESS

# Leave Your Mark.

*Set the New Standard  
With the Conners  
Early Childhood.™*

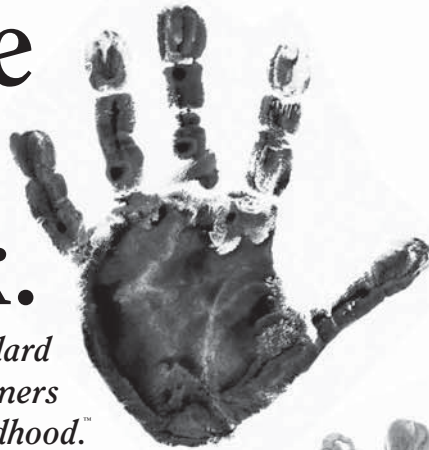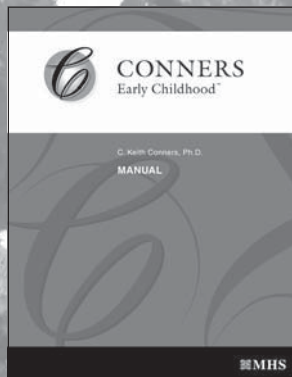

**SAVE \$100.00**  
when you order the  
*Conners Early  
Childhood Complete  
Scoring Software Kit  
before August 1, 2009.*

When ordering, please quote  
promotional code SE18.

There is more than one layer to a child's psychological and developmental health. Young children between the ages of 2 to 6 are multi-faceted and complex. Let the *Conners Early Childhood* assist you in identifying when early intervention is required.

The *Conners Early Childhood* is designed to assess the concerns of parents and childcare providers in preschool-aged children and aids in the early identification of a multitude of problems; behavioral, social, and emotional.

The *Conners Early Childhood* also measures whether or not a child's developmental milestones (Adaptive Skills, Communication, Motor Skills, Play, and Pre-Academic/Cognitive) are being met.

The *Conners Early Childhood* provides:

- Multi-informant (parent, teacher/childcare provider) assessment that allows for easy comparison across raters
- Full-length, Short, Behavior, Developmental Milestones, and Global Index forms
- Validity scales
- Clear and direct links to the *Individuals with Disabilities Education Improvement Act 2004* (IDEA 2004)
- Excellent reliability and validity
- Easy administration, scoring, and results interpretation
- Spanish versions

The *Conners Early Childhood* sets a new standard in assessing and identifying problems in preschool-aged children. Order your copy today.

MHS, committed to bringing you the very best in assessments and rating scales.

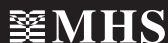

USA Tel: 1.800.456.3003  
CAN Tel: 1.800.268.6011

WEBSITE [www.mhs.com/conners](http://www.mhs.com/conners)  
EMAIL [customerservice@mhs.com](mailto:customerservice@mhs.com)

**CONNERS**  
*As always. As never before.™*

**2/3 of depressed patients will not be able to achieve and maintain remission with their initial antidepressant.**

You are invited to attend a **FREE** on-demand webinar by logging onto: [www.deplinanddepression.com/psych](http://www.deplinanddepression.com/psych)

**“Novel Augmentation in Major Depressive Disorder”**

**Andrew J. Cutler, M.D.**  
 Courtesy Assistant Professor, Department of Psychiatry, University of Florida, Medical Director, Florida Clinical Research Center, LLC

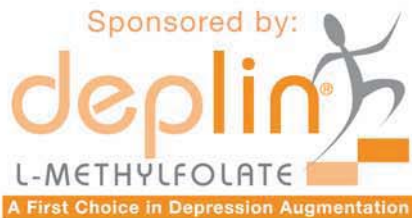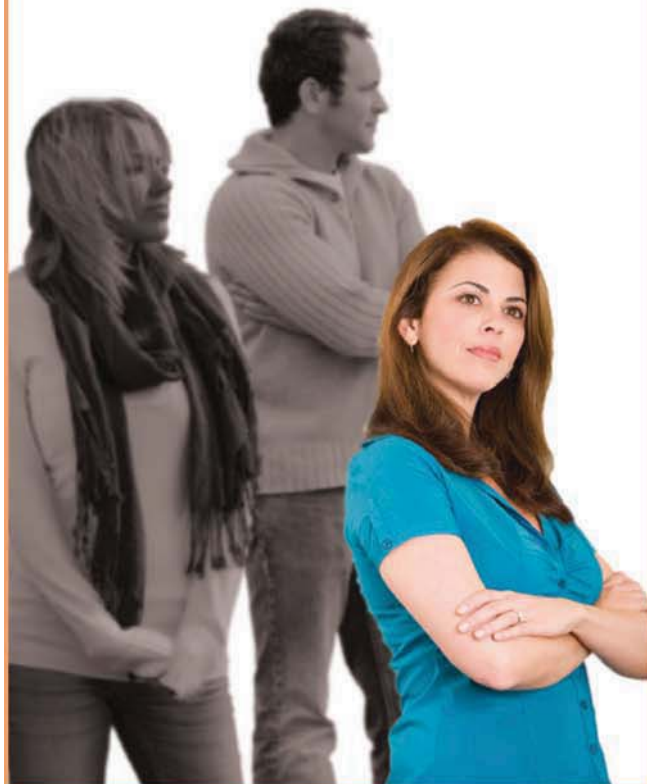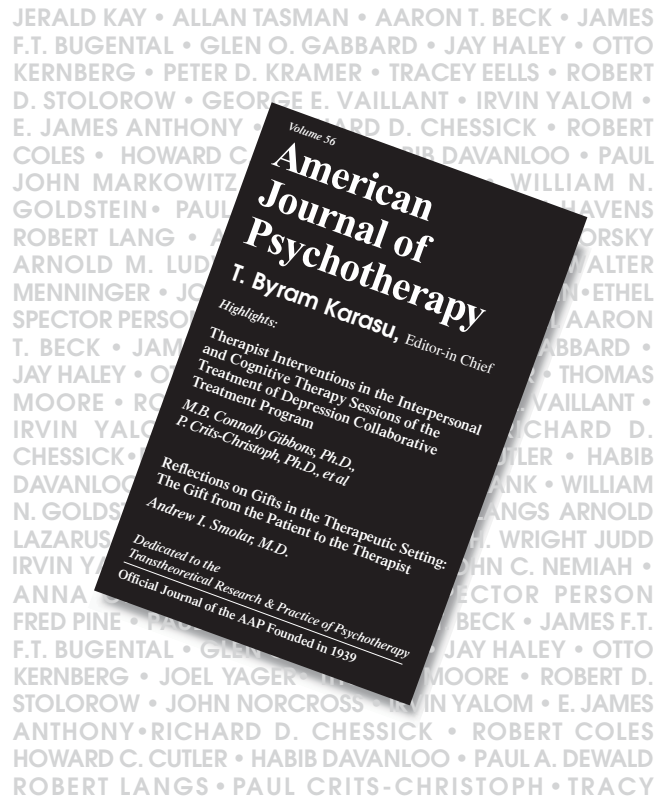

Incorporating the *Journal of Psychotherapy Practice and Research*  
 Published four times per annum: *American Journal of Psychotherapy*  
 Belfer Center, Room 405 • 1300 Morris Park Avenue • Bronx, NY 10461  
 Telephone: (718) 430-3503, FAX: (718) 430-8907  
 E-mail: [info@ajp.org](mailto:info@ajp.org); Web site: [www.ajp.org](http://www.ajp.org)

**PSYCHIATRISTS**  
*The VA Needs You*

|                                                               |                                                 |                                                  |
|---------------------------------------------------------------|-------------------------------------------------|--------------------------------------------------|
| Shreveport, LA<br>Alexandria, LA<br>Biloxi, MS<br>Jackson, MS | Pensacola, FL<br>Mt. Vernon, MO<br>Muskogee, OK | Fayetteville, AR<br>Fort Smith, AR<br>Mobile, AL |
|---------------------------------------------------------------|-------------------------------------------------|--------------------------------------------------|

Psychiatrist positions require: BE/BC Psychiatrists, current, full, unrestricted licensure (any state), U.S. citizen Great Benefits, Excellent Pay, Rewarding Work. See announcements on [www.vacareers.va.gov](http://www.vacareers.va.gov). Recruitment/Relocation incentives may be authorized, ask contact individual for details.

**BILOXI/PENSACOLA** Outpatient and Inpatient Psychiatry positions. Expertise in substance abuse, geropsychiatry and PTSD preferred. BE/BC psychiatrist, state license (any state), U.S. citizen or permanent resident. Send applications to Jean Williams, HRMS (05A), 400 Veterans Avenue, Biloxi, MS or contact at [jean.williams@med.va.gov](mailto:jean.williams@med.va.gov) or (228) 523-5633.

**ALEXANDRIA** Strong Clinical Skills. Prefer experience in General Outpatient, Inpatient Psychiatry, and Substance Abuse. CV/Application to [heather.ball@va.gov](mailto:heather.ball@va.gov) or mail to Heather Ball/Psychiatry Service (116), P.O. Box 69004, Alexandria, LA 71306-9004. For additional questions, please call (318) 466-2958.

**SHREVEPORT** Prefer experience in general psychiatry, including inpatient, outpatient, consultative, or telemedicine psychiatry. Interested candidates should submit a CV to Sherri Collier, Human Resources (05), Overton Brooks VA Medical Center, 510 E. Stoner Ave, Shreveport, LA 71101 or via email: [sherri.collier@va.gov](mailto:sherri.collier@va.gov) phone: (318) 990-5147.

**FAYETTEVILLE, FORT SMITH, ARKANSAS; BRANSON, MISSOURI** Contact Betty Gray (479)443-4301 ext 5188 or email: [betty.gray@va.gov](mailto:betty.gray@va.gov).

**MUSKOGEE, OK** Contact Jason Cleveland, HRMS at 918-577-3800.

**JACKSON, MISSISSIPPI** Duties may involve several aspects of general psychiatry, including inpatient, outpatient, consultative, or telemedicine psychiatry. Interested candidates should submit a CV to Felicia Owens, Human Resources (05P), VA Medical Center, 1500 E. Woodrow Wilson Dr., Jackson, MS 39216 or [Felicia.owens@va.gov](mailto:Felicia.owens@va.gov) phone: 601-364-1575. Equal Opportunity Employer.

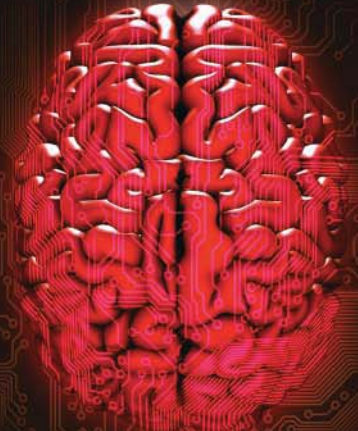

# The Pathophysiology of ADHD: Implications for Treatment

## Program Chair

**Timothy E. Wilens, MD**  
Associate Professor, Psychiatry  
Harvard Medical School  
Director, Substance Abuse Services  
Pediatric Psychopharmacology  
Research Program  
Massachusetts General Hospital  
Boston, Massachusetts

## Distinguished Faculty

**Darin D. Dougherty, MD**  
Associate Professor, Psychiatry  
Harvard Medical School  
Boston, Massachusetts  
Director of Neurotherapeutics,  
Psychiatry  
Massachusetts General Hospital  
Charlestown, Massachusetts

**Paul G. Hammerness, MD**  
Assistant Professor, Psychiatry  
Harvard Medical School  
Boston, Massachusetts  
Scientific Coordinator, Pediatric  
ADHD Research  
Pediatric Psychopharmacology  
Research and Adult ADHD  
Massachusetts General Hospital  
Cambridge, Massachusetts

**Avis B. Hains, PhD**  
Postdoctoral Scholar, Neurobiology  
Yale University  
New Haven, Connecticut

Sponsored by the American  
Psychiatric Association

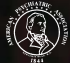

Supported by an educational grant  
from Shire.

**Shire**

## APA 2009 Annual Meeting

San Francisco, California • Sunday, May 17, 2009  
Hilton San Francisco • Grand Ballroom, Salon B

### Dinner

6:30 PM

### Welcome and Preactivity Educational Outcomes Measurement

7:00 PM

Timothy E. Wilens, MD

### The Neurobiology of ADHD: Overview of the Mechanisms of Efficacious Agents

7:10 PM

Paul G. Hammerness, MD

### Role of Dopamine in ADHD

7:30 PM

Darin D. Dougherty, MD

### Alpha Agonists in the Prefrontal Cortex

7:50 PM

Avis B. Hains, PhD

### Nicotinic Receptors and Agonists in ADHD

8:10 PM

Timothy E. Wilens, MD

### Discussion, Q&A

8:30 PM

Chair and Faculty

*The American Psychiatric Association (APA) is accredited by the Accreditation Council for Continuing Medical Education to provide continuing medical education for physicians.*

*The APA designates this educational activity for a maximum of 2 AMA PRA Category 1 Credits™. Physicians should only claim credit commensurate with the extent of their participation in the activity.*

*Attendees must be registered for the APA Annual Meeting to attend this symposium. Seating is limited and will be based on first-come, first-served. For more information about the meeting, please visit the APA Web site at [www.psych.org](http://www.psych.org) or contact the APA toll free at 1-888-357-7924 (within the U.S. or Canada) or 703-907-7300.*

Registered conference participants and registered guests may attend any industry-supported symposium at the APA meeting.

### Learning Objectives

After attending this educational activity, a participant should be able to:

1. Differentiate the mechanisms of action of medications used to treat ADHD.
2. Explain the roles of dopamine and norepinephrine in ADHD pathophysiology and treatment.
3. Discuss the role of nicotinic receptor agonists as future treatments for ADHD.

“ EACH DAY IS **CHALLENGING.**  
EACH DAY IS **DIFFERENT.**  
EACH DAY IS **REWARDING...** ”

*Lieutenant Wendy Pettit, Behavioral Health Social Worker  
U.S. Public Health Service Commissioned Corps*

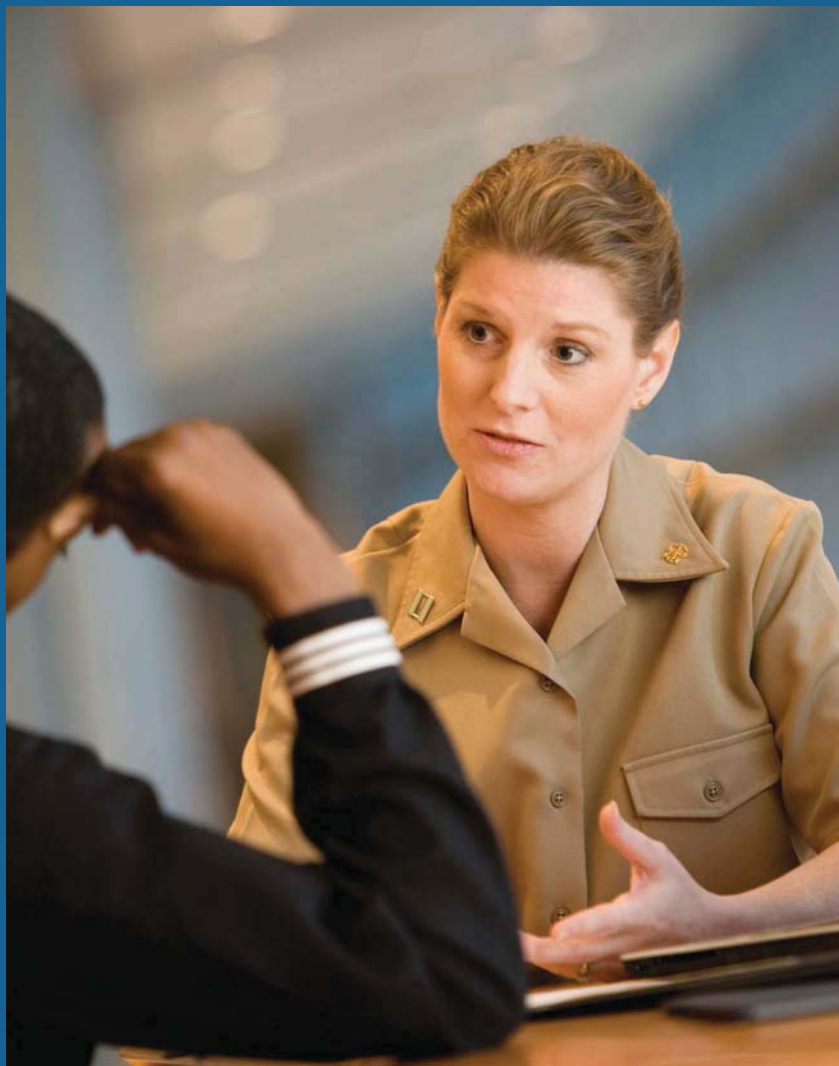

## BE A LEADER IN MENTAL HEALTH.

Mental health officers in the U.S. Public Health Service Commissioned Corps are part of an elite team bringing mental and behavioral health services to people most in need. Under a new partnership with the U.S. Department of Defense, Commissioned Corps officers may be detailed to military medical treatment facilities. These officers will provide psychiatric services, counseling, and family and group therapy to returning war fighters, their family members, and military retirees. Corps officers are rewarded with an excellent package of salary and benefits, including health coverage, tax-free allowances for housing and food, 30 days of vacation each year, and much more.

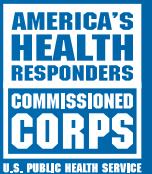

### READY TO MAKE A DIFFERENCE?

**MAKE THE U.S. PUBLIC HEALTH SERVICE COMMISSIONED CORPS THE HIGHLIGHT OF YOUR CAREER.**

The U.S. Department of Health and Human Services is an equal opportunity employer.

[www.usphs.gov](http://www.usphs.gov)

1-800-279-1605

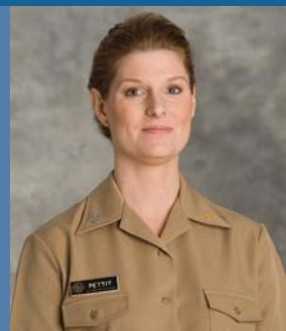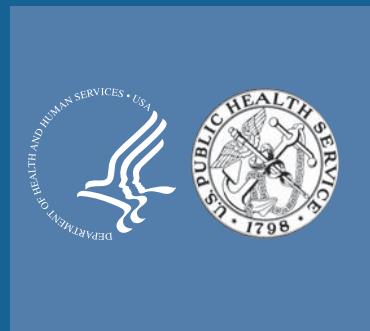

**Mental Health Care Professionals**  
Psychiatrists/Psychologists/Social Workers  
Clinical Nurse Specialists/Addiction Therapists

Join VA Northern California Health Care System's (NCHCS) mental health care team and support America's heroes. NCHCS is now hiring mental health care professionals to be part of our interdisciplinary care team; you'll treat patients struggling with the full range of emotional and mental disorders, including PTSD, traumatic brain injuries, mood disorders, substance abuse disorders, and sexual trauma. You'll work in an environment where innovation is encouraged and scientific evidence directs our practice.

We are now hiring for full and part time positions in Sacramento, Fairfield, Redding and Chico. Call today and be a part of VA's Mental Health Enhancement Initiative.

- Interdisciplinary care team model of practice
- Practice model is based on care needs, not insurance company regulations
- Your out of state license allows you to practice at any of our facilities
- Diverse professional opportunities – clinical, leadership, research, education, and national policy development
- Salary is competitive and based on credentials and experience
- Exceptional paid time off package
- Excellent health and retirement benefits
- Student loan reimbursement of up to \$38,000 for psychiatrists, psychologists and psychiatric nurses

Please email Mary Silva, Human Resources Specialist at [mary.silva@va.gov](mailto:mary.silva@va.gov)

Department of Veterans Affairs an Equal Opportunity Employer

**BC/BE ADULT PSYCHIATRIST**

**McLeod Health** is seeking a Full-Time BC/BE Adult Psychiatrist for our Behavioral Health Psychiatric Center located in a beautiful rural setting in Darlington, SC, just minutes away from the main flagship hospital, McLeod Regional Medical Center in Florence, SC.

We have an extensive support staff for the hospital and ED consults and a twenty-four hour Access Center. Our state-of-the-art 23-bed crisis intervention in-patient facility was built and designed specifically for the needs of the psychiatric patient. We also provide out-patient therapy for patients in a private-practice setting.

We offer a competitive salary, comprehensive benefits and retirement package, paid professional liability insurance, CME allowance, relocation assistance, and sign-on bonus.

**McLeod Regional Medical Center** is a 453 bed, tertiary care, and teaching facility serving a primary market of 6 counties, and receiving tertiary referrals from 12 counties for a total population of 1 million people.

**McLeod** is leading the way for the nation in patient care by improving quality and safety. We are committed to developing patient-centered, evidence-based, physician-led quality health care in a not-for-profit hospital system that values each individual patient.

**If you are interested in joining this nationally recognized hospital, please contact Janisyn McLaurin at 843-777-5169 or by email at [jmclaurin@mcleodhealth.org](mailto:jmclaurin@mcleodhealth.org).**

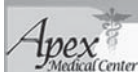

**Great Opportunity Beautiful Las Vegas!**

**PSYCHIATRIST**

Multi-speciality group seeking friendly motivated second Psychiatrist.

Competitive compensation package including: Medical/dental insurance, 401K paid malpractice, paid vacation/CME, relocation assistance, etc.

Main office at Central Las Vegas  
JI/HVisa May Apply!

Fax Resume to: 702-947-6702  
Or E-mail: [drez@apexmedicalcenter.net](mailto:drez@apexmedicalcenter.net)

**APEX MEDICAL CENTER**

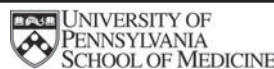

**ASSISTANT PROFESSOR**

The Department of Psychiatry at the University of Pennsylvania School of Medicine seeks candidates for an Assistant Professor position in the tenure track.

The successful applicant will have experience in the field of psychiatry with a focus on translational neuroscience. Responsibilities include the development of an independent academic laboratory within the Translational Neuroscience Program.

The successful candidate will participate in clinical service and clinical research. Applicants must have an M.D or M.D./Ph.D. degree. Board certification in Psychiatry with a PA medical license or eligibility is required.

The successful applicant must have substantial post graduate research experience and have the capability to direct an independent laboratory that will be highly integrated into the Translational Neuroscience Program, including participation in joint grant applications and studies.

Experience with treatment development, animal models, circuit modeling or clinical research is required. Experience spanning pre-clinical/clinical studies is preferred. The successful applicant should have a record of independent funding.

Please submit curriculum vitae, a cover letter, and references to:

**Dwight L. Evans, M.D.**  
**Ruth Meltzer Professor and Chair; Steven Siegel, Associate Professor and Dir., Translational Neuroscience Program; REF#148**  
c/o A. Plotnick, Department of Psychiatry  
University of Pennsylvania School of Medicine  
305 Blockley Hall, 423 Guardian Drive, Philadelphia, PA 19104  
E-mail: [plotnick@upenn.edu](mailto:plotnick@upenn.edu)

THE UNIVERSITY OF PENNSYLVANIA IS AN EQUAL OPPORTUNITY, AFFIRMATIVE ACTION EMPLOYER. WOMEN AND MINORITY CANDIDATES ARE STRONGLY ENCOURAGED TO APPLY.

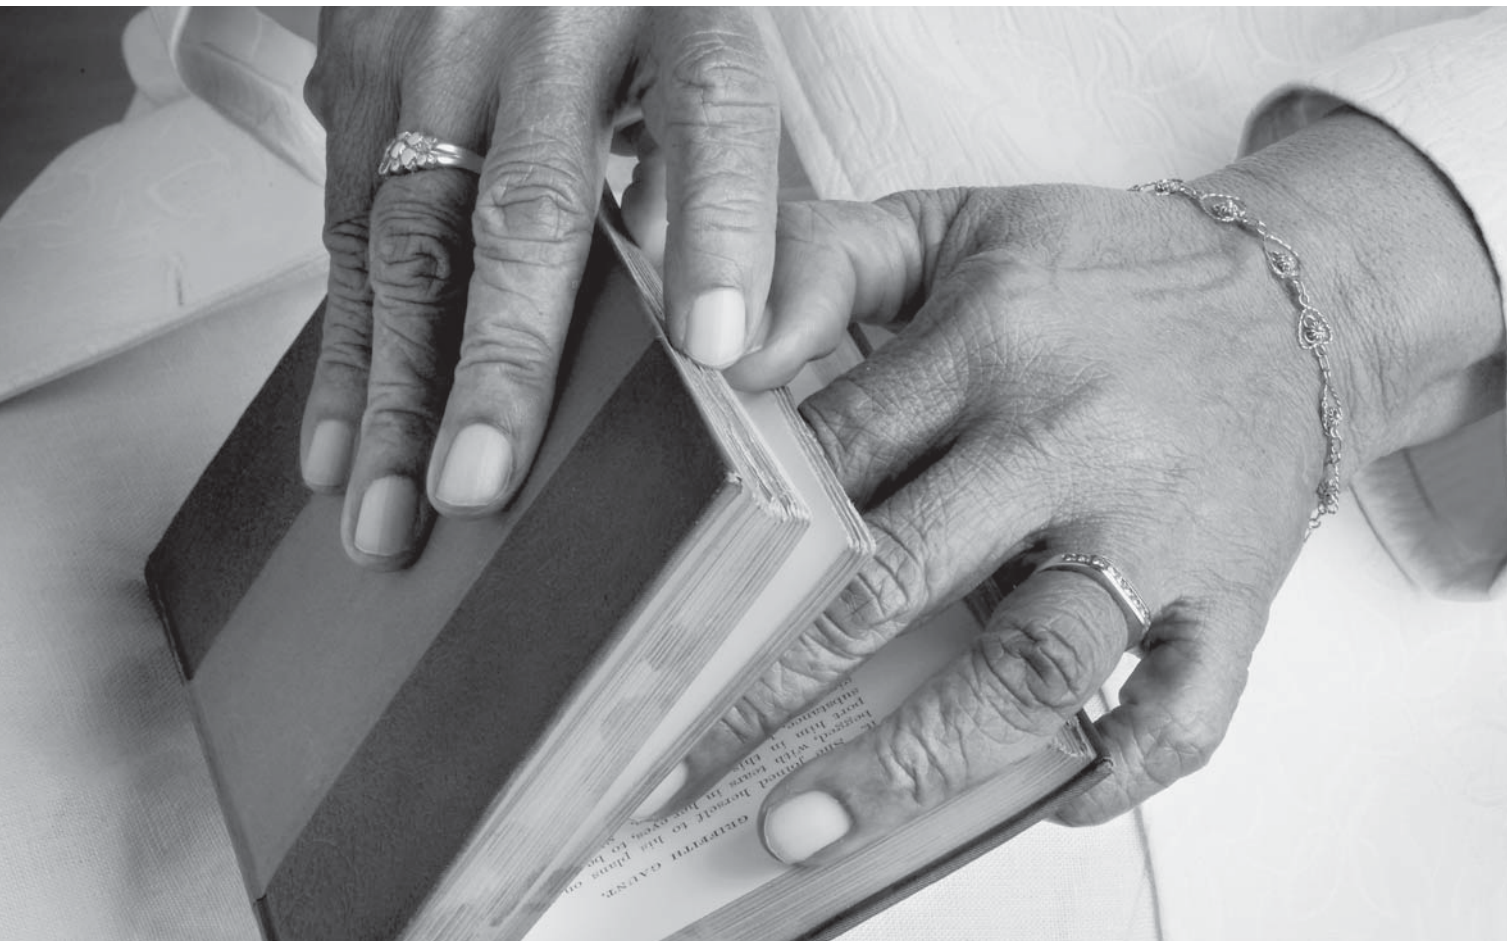

## Complex puzzles. Comprehensive solutions.

At Western Psychiatric Institute and Clinic of UPMC, we take on complex disorders that some other centers won't even attempt to treat.

But whether a patient has a difficult-to-treat disorder or one more easily treated, teams of specialists in psychiatry, psychopharmacology, clinical psychology, and medicine craft complete, individualized treatment plans that draw upon the latest clinical research, much of it conducted by our own investigators. Whether we're interpreting our clinical trial data or a patient's lab results, our work to advance the understanding and treatment of bipolar disorder,

eating disorders, autism, and geriatric behavioral health issues is world-class. In fact, we have one of the world's most comprehensive programs for mood disorders, with research-based treatments for patients at every level of need, at every stage of life.

With more than 400 inpatient psychiatric beds and 75 ambulatory programs, we care for people when they're feeling their worst *and* support them when they're at their best, back with their families in their home towns. Each year, Western Psychiatric helps some 30,000 people of all ages — at all stages of recovery, from all over the world — live healthier and more productive lives.

# UPMC

upmc.com | 1-800-533-UPMC

Affiliated with the **University of Pittsburgh School of Medicine**, UPMC is ranked among the nation's best hospitals by *U.S. News & World Report*.



# Index to Advertisers

## May 2009

The publication of an advertisement in this journal does not imply endorsement of the product or service by the American Psychiatric Association.

|                                                      |                          |
|------------------------------------------------------|--------------------------|
| Employment Opportunities .....                       | A24-A27                  |
| Institute of Living/Hartford Hospital.....           | A15                      |
| McLean Hospital .....                                | A15                      |
| Multi-Health Systems .....                           | A19                      |
| Osler Institute .....                                | A15                      |
| Oxford University Press.....                         | A17                      |
| PAMLAB.....                                          | A20                      |
| Symposia.....                                        | C2, A1, A2, A7, A13, A21 |
| University of North Carolina Chapel Hill .....       | A7                       |
| U.S. Pharmaceuticals, Pfizer Inc.<br>Geodon IM ..... | A9-A10                   |
| Wyeth Pharmaceuticals<br>Pristiq .....               | A28, C3-C4               |

### ATASCADERO STATE HOSPITAL

BE/BC Psychiatrist

Atascadero State Hospital now pays board certified psychiatrists starting at \$223,464 and advancing stepwise to \$255,732. Atascadero is the nation's premier center for the treatment of forensically committed mentally ill patients. Our hospital is a teaching site affiliated with the University of California, accredited by JCAHO, and recipient of the prestigious Codman Award. All of our psychiatrists are board eligible and most are board certified. Many of our psychiatrists have forensic subspecialty boards.

We are located midway between San Francisco and Los Angeles on the scenic central California Coast, south of Big Sur. We offer a spectacularly beautiful environment in San Luis Obispo County with temperate climate, beaches, world class wineries, cultural activities, golfing, sailing, riding, clean air, and excellent schools through the University level.

Our benefit package is valued at an additional 30%, which includes retirement plans (including safety retirement), health plans, professional liability coverage, paid holidays, educational leave, and generous annual leave. On-call duty is compensated hour for hour over and above the base salary. Applicants must hold a current California license, or have pending application with the Medical Board of California.

For a prompt and confidential review, send CV to:

**Jeanne Garcia, M.D.**  
**P. O. Box 7001**  
**Atascadero, CA 93423-7001**  
**(805) 468-2005 or fax (805) 468-2138**  
**or e-mail us: [jeanne.garcia@ash.dmh.ca.gov](mailto:jeanne.garcia@ash.dmh.ca.gov)**

**WE ARE AN EQUAL OPPORTUNITY EMPLOYER.**

### PARTNER WITH A MAGNET HOSPITAL

BC/BE Psychiatrist needed to serve as Medical Director of an 11-bed Inpatient Behavioral Health Services Unit and to add capacity for our Outpatient Program.

Call is shared with 5 local psychiatrists. Practice is located at Aspirus Wausau Hospital, named in the top 100 hospitals in the USA by *US News and World Report*. Work with a great team of young, vibrant psychiatrists. There is great potential for program growth and development with a focus on expanded community action. Excellent compensation and benefit package included.

As you work within the open and inviting architecture of Aspirus, you will be part of our outstanding award-winning facility. We invite you to join a first-rate medical community and a family-friendly quality of life in north central Wisconsin.

Please contact Jamie Sitko today at 800-792-8728 or fax CV to 715-847-2742.

Email: [jamiesi@aspirus.org](mailto:jamiesi@aspirus.org)  
[www.aspirus.org](http://www.aspirus.org)

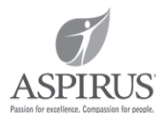

## Subscription and Business Information

The American Journal of Psychiatry, ISSN 0002-953X, is published monthly by the American Psychiatric Association, 1000 Wilson Blvd., Suite 1825, Arlington, VA 22209-3901. Subscriptions (per year): individual \$205.00, international \$308.00. For additional subscription options, including single issues and student rates, please contact Customer Service at 1-800-368-5777 or email [appi@psych.org](mailto:appi@psych.org). Institutional subscriptions are tier priced. For institutional site license or pricing information, contact Customer Service or visit <http://highwire.stanford.edu/tfocis/>.

Business communications, address changes, and subscription questions from APA members should be directed to the Division of Member Services: (888) 35-PSYCH (toll-free). Nonmember subscribers should call the Circulation Department (800) 368-5777. Author inquiries should be directed to the Journal editorial office: (703) 907-7885 or (703) 907-7884; fax (703) 907-1096; e-mail [ajp@psych.org](mailto:ajp@psych.org).

Business Management: Nancy Frey, Director, Publishing Services; Laura G. Abedi, Associate Director, Production; Alison Jones, Advertising Prepress Manager; Robert Pursell, Director, Sales and Marketing.

Pharmaceutical Print Advertising: Frank Cox, Kathleen Harrison, Valentin Torres, Pharmaceutical Media, Inc. 30 East 33rd Street, New York, NY 10016. (212) 685-5010; fax (212) 685-6126; e-mail [vtorres@pminy.com](mailto:vtorres@pminy.com).

Nonpharmaceutical and Online Sales: Brian Skepton, (703) 907-7332; e-mail [bskepton@psych.org](mailto:bskepton@psych.org).

Pages are produced using Adobe FrameMaker+ SGML 6.0. Printed by RR Donnelley, Mendota, IL, on acid-free paper effective with Volume 164, Number 11, November 2007.

Periodicals postage paid at Arlington, VA, and additional mailing offices. POSTMASTER: Send address changes to The American Journal of Psychiatry, Circulation Department, American Psychiatric Association, 1000 Wilson Blvd., Suite 1825, Arlington, VA 22209-3901.

Indexed in Abstracts for Social Workers, Academic Abstracts, Biological Abstracts, Chemical Abstracts, Chicago Psychoanalytic Literature Index, Cumulative Index to Nursing Literature, Excerpta Medica, Hospital Literature Index, Index Medicus, International Nursing Index, Nutrition Abstracts, Psychological Abstracts, Science Citation Index, Social Science Source, and Social Sciences Index.

The American Psychiatric Association does not hold itself responsible for statements made in its publications by contributors or advertisers. Unless so stated, material in The American Journal of Psychiatry does not reflect the endorsement, official attitude, or position of the American Psychiatric Association or of the Journal's Editorial Board.

Authorization to photocopy items for internal or personal use, or the internal or personal use of specific clients, is granted by the American Psychiatric Association for libraries and other users registered with the Copyright Clearance Center (CCC) Transactional Reporting Service, provided that the base fee of \$15.00 per copy is paid directly to CCC, 222 Rosewood Drive, Danvers, MA 01923; (978) 750-8400 (tel), (978) 646-8600 (fax), [www.copyright.com](http://www.copyright.com) (web site). 0002-953X/05/\$15.00.

This consent does not extend to other kinds of copying, such as copying for general distribution, for advertising or promotional purposes, for creating new collective works, or for resale. Requests for commercial distribution should be directed to (703) 907-7894. APA does not require that permission be obtained for the photocopying of isolated articles for nonprofit classroom or library reserve use; all fees associated with such permission are waived.

Copyright © 2009 American Psychiatric Association.

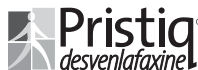

Extended-Release Tablets

**BRIEF SUMMARY.** See package insert for full Prescribing Information. For further product information and current package insert, please visit [www.wyeth.com](http://www.wyeth.com) or call our medical communications department toll-free at 1-800-934-5556.

### WARNING: Suicidality and Antidepressant Drugs

Antidepressants increased the risk compared to placebo of suicidal thinking and behavior (suicidality) in children, adolescents, and young adults in short-term studies of Major Depressive Disorder (MDD) and other psychiatric disorders. Anyone considering the use of Pristiq or any other antidepressant in a child, adolescent, or young adult must balance this risk with the clinical need. Short-term studies did not show an increase in the risk of suicidality with antidepressants compared to placebo in adults beyond age 24; there was a reduction in risk with antidepressants compared to placebo in adults aged 65 and older. Depression and certain other psychiatric disorders are themselves associated with increases in the risk of suicide. Patients of all ages who are started on antidepressant therapy should be monitored appropriately and observed closely for clinical worsening, suicidality, or unusual changes in behavior. Families and caregivers should be advised of the need for close observation and communication with the prescriber. Pristiq is not approved for use in pediatric patients [see Warnings and Precautions (5.1), Use in Specific Populations (8.4), and Patient Counseling Information (17.1 in the full prescribing information)].

**INDICATIONS AND USAGE:** Pristiq, a selective serotonin and norepinephrine reuptake inhibitor (SNRI), is indicated for the treatment of major depressive disorder (MDD).

**CONTRAINDICATIONS:** Hypersensitivity-Hypersensitivity to desvenlafaxine succinate, venlafaxine hydrochloride or to any excipients in the Pristiq formulation. Monoamine Oxidase Inhibitors-Pristiq must not be used concomitantly in patients taking monoamine oxidase inhibitors (MAOIs) or in patients who have taken MAOIs within the preceding 14 days due to the risk of serious, sometimes fatal, drug interactions with SNRI or SSRI treatment or with other serotonergic drugs. Based on the half-life of desvenlafaxine, at least 7 days should be allowed after stopping Pristiq before starting an MAOI [see Dosage and Administration (2.5) in the full prescribing information].

**WARNINGS AND PRECAUTIONS: Clinical Worsening and Suicide Risk-**Patients with major depressive disorder (MDD), both adult and pediatric, may experience worsening of their depression and/or the emergence of suicidal ideation and behavior (suicidality) or unusual changes in behavior, whether or not they are taking antidepressant medications, and this risk may persist until significant remission occurs. Suicide is a known risk of depression and certain other psychiatric disorders, and these disorders themselves are the strongest predictors of suicide. There has been a long-standing concern, however, that antidepressants may have a role in inducing worsening of depression and the emergence of suicidality in certain patients during the early phases of treatment. Pooled analyses of short-term placebo-controlled studies of antidepressant drugs (SSRIs and others) showed that these drugs increase the risk of suicidal thinking and behavior (suicidality) in children, adolescents, and young adults (ages 18-24) with major depressive disorder (MDD) and other psychiatric disorders. Short-term studies did not show an increase in the risk of suicidality with antidepressants compared to placebo in adults beyond age 24; there was a reduction with antidepressants compared to placebo in adults aged 65 and older. The pooled analyses of placebo-controlled studies in children and adolescents with MDD, obsessive compulsive disorder (OCD), or other psychiatric disorders included a total of 24 short-term studies of 9 antidepressant drugs in over 4,400 patients. The pooled analyses of placebo-controlled studies in adults with MDD or other psychiatric disorders included a total of 295 short-term studies (median duration of 2 months) of 11 antidepressant drugs in over 77,000 patients. There was considerable variation in risk of suicidality among drugs, but a tendency toward an increase in the younger patients for almost all drugs studied. There were differences in absolute risk of suicidality across the different indications, with the highest incidence in MDD. The risk differences (drug vs. placebo), however, were relatively stable within age strata and across indications. These risk differences (drug-placebo difference in the number of cases of suicidality per 1000 patients treated) are provided in Table 1 of the full prescribing information. No suicides occurred in any of the pediatric studies. There were suicides in the adult studies, but the number was not sufficient to reach any conclusion about drug effect on suicide. It is unknown whether the suicidality risk extends to longer-term use, i.e., beyond several months. However, there is substantial evidence from placebo-controlled maintenance studies in adults with depression that the use of antidepressants can delay the recurrence of depression. **All patients being treated with antidepressants for any indication should be monitored appropriately and observed closely for clinical worsening, suicidality, and unusual changes in behavior, especially during the initial few months of a course of drug therapy, or at times of dose changes, either increases or decreases.** The following symptoms, anxiety, agitation, panic attacks, insomnia, irritability, hostility, aggressiveness, impulsivity, akathisia (psychomotor restlessness), hypomania, and mania, have been reported in adult and pediatric patients being treated with antidepressants for major depressive disorder as well as for other indications, both psychiatric and nonpsychiatric. Although a causal link between the emergence of such symptoms and either the worsening of depression and/or the emergence of suicidal impulses has not been established, there is concern that such symptoms may represent precursors to emerging suicidality. Consideration should be given to changing the therapeutic regimen, including possibly discontinuing the medication, in patients whose depression is persistently worse, or who are experiencing emergent suicidality or symptoms that might be precursors to worsening depression or suicidality, especially if these symptoms are severe, abrupt in onset, or were not part of the patient's presenting symptoms. If the decision has been made to discontinue treatment, medication should be tapered, as rapidly as is feasible, but with recognition that abrupt discontinuation can be associated with certain symptoms [see Warnings and Precautions (5.9) and Dosage and Administration (2.3) in the full prescribing information for a description of the risks of discontinuation of Pristiq]. Families and caregivers of patients being treated with antidepressants for major depressive disorder or other indications, both psychiatric and nonpsychiatric, should be alerted about the need to monitor patients for the emergence of agitation, irritability, unusual changes in behavior, and the other symptoms described above, as well as the emergence of suicidality, and to report such symptoms immediately to health care providers. Such monitoring should include daily observation by families and caregivers. Prescriptions for Pristiq should be written for the smallest quantity of tablets consistent with good patient management, in order to reduce the risk of overdose. **Screening patients for bipolar disorder-** A major depressive episode may be the initial presentation of bipolar disorder. It is generally believed (though not established in controlled studies) that treating such an episode with an antidepressant alone may increase the likelihood of precipitation of a mixed/manic episode in patients at risk for bipolar disorder. Whether any of the symptoms described above represent such a conversion is unknown. However, prior to initiating treatment with an antidepressant, patients with depressive symptoms should be adequately screened to determine if they are at risk for bipolar disorder; such screening should include a detailed psychiatric history, including a family history of suicide, bipolar disorder, and depression. It should be noted that Pristiq is not approved for use in treating bipolar depression. **Serotonin Syndrome-** The development of a potentially life-threatening serotonin syndrome may occur with Pristiq treatment, particularly with concomitant use of other serotonergic drugs (including SSRIs, SNRIs and triptans) and with drugs that impair metabolism of serotonin (including MAOIs). The concomitant use of Pristiq and MAOIs is contraindicated [see Contraindications (4.2)]. If concomitant treatment with Pristiq and an SSRI, another SNRI or a 5-hydroxytryptamine receptor agonist (triptan) is clinically warranted, careful observation of the patient is advised, particularly during treatment initiation and dose increases. The concomitant use of Pristiq with serotonin precursors (such as tryptophan supplements) is not recommended. **Elevated Blood Pressure-** Patients receiving Pristiq should have regular monitoring of blood pressure since dose-dependent increases were observed in clinical studies. Pre-existing hypertension should be controlled before initiating treatment with Pristiq. Caution should be exercised in treating patients with pre-existing hypertension or other underlying conditions that might be compromised by increases in blood pressure. Cases of elevated blood pressure requiring immediate treatment have been reported with Pristiq. **Sustained hypertension-** Sustained blood pressure increases could have adverse consequences. For patients who experience a sustained increase in blood pressure while receiving Pristiq, either dose reduction or discontinuation should be considered [see Adverse Reactions (6.1)]. Treatment with Pristiq in controlled studies was associated with sustained hypertension, defined as treatment-emergent supine diastolic blood pressure (SDBP)  $\geq 90$  mm Hg and  $\geq 10$  mm Hg above baseline for 3 consecutive on-therapy visits. In clinical studies, regarding the proportion of patients with sustained hypertension, the following rates were observed: placebo (0.5%), Pristiq 50 mg (1.3%), Pristiq 100 mg (0.7%), Pristiq 200 mg (1.1%), and Pristiq 400 mg (2.3%). Analyses of patients in Pristiq controlled studies who met criteria for sustained hypertension revealed a dose-dependent increase in the proportion of patients who developed sustained hypertension. **Abnormal Bleeding-** SSRIs and SNRIs can increase the risk of bleeding events. Concomitant use of aspirin, other drugs that affect platelet function, nonsteroidal anti-inflammatory drugs, warfarin, and other anticoagulants can add to this risk. Bleeding events related to SSRIs and SNRIs have ranged from ecchymosis, hematoma, epistaxis, and petechiae to life-threatening hemorrhages. Patients should be cautioned about the risk of bleeding associated with the concomitant use of Pristiq and NSAIDs, aspirin, or other drugs that affect coagulation or bleeding. **Narrow-angle Glaucoma-** Mydriasis has been reported in association with Pristiq;

therefore, patients with raised intraocular pressure or those at risk of acute narrow-angle glaucoma (angle-closure glaucoma) should be monitored. **Activation of Mania/Hypomania**-During all MDD and VMS (vasomotor symptoms) phase 2 and phase 3 studies, mania was reported for approximately 0.1% of patients treated with Pristiq. Activation of mania/hypomania has also been reported in a small proportion of patients with major affective disorder who were treated with other marketed antidepressants. As with all antidepressants, Pristiq should be used cautiously in patients with a history or family history of mania or hypomania. **Cardiovascular/Cerebrovascular Disease**-Caution is advised in administering Pristiq to patients with cardiovascular, cerebrovascular, or lipid metabolism disorders [see *Adverse Reactions* (6.1)]. Increases in blood pressure and heart rate were observed in clinical studies with Pristiq. Pristiq has not been evaluated systematically in patients with a recent history of myocardial infarction, unstable heart disease, uncontrolled hypertension, or cerebrovascular disease. Patients with these diagnoses, except for cerebrovascular disease, were excluded from clinical studies. **Serum Cholesterol and Triglyceride Elevation**-Dose-related elevations in fasting serum total cholesterol, LDL (low density lipoprotein) cholesterol, and triglycerides were observed in the controlled studies. Measurement of serum lipids should be considered during treatment with Pristiq [see *Adverse Reactions* (6.1)]. **Discontinuation of Treatment with Pristiq**-Discontinuation symptoms have been systematically and prospectively evaluated in patients treated with Pristiq during clinical studies in Major Depressive Disorder. Abrupt discontinuation or dose reduction has been associated with the appearance of new symptoms that include dizziness, nausea, headache, irritability, insomnia, diarrhea, anxiety, fatigue, abnormal dreams, and hyperhidrosis. In general, discontinuation events occurred more frequently with longer duration of therapy. During marketing of SNRIs (Serotonin and Norepinephrine Reuptake Inhibitors) and SSRIs (Selective Serotonin Reuptake Inhibitors), there have been spontaneous reports of adverse events occurring upon discontinuation of these drugs, particularly when abrupt, including the following: dysphoric mood, irritability, agitation, dizziness, sensory disturbances (e.g., paresthesia, such as electric shock sensations), anxiety, confusion, headache, lethargy, emotional lability, insomnia, hypomania, tinnitus, and seizures. While these events are generally self-limiting, there have been reports of serious discontinuation symptoms. Patients should be monitored for these symptoms when discontinuing treatment with Pristiq. A gradual reduction in the dose rather than abrupt cessation is recommended whenever possible. If intolerable symptoms occur following a decrease in the dose or upon discontinuation of treatment, then resuming the previously prescribed dose may be considered. Subsequently, the physician may continue decreasing the dose, but at a more gradual rate [see *Dosage and Administration* (2.4) and *Adverse Reactions* (6.1) in full prescribing information]. **Renal Impairment**-In patients with moderate or severe renal impairment or end-stage renal disease (ESRD) the clearance of Pristiq was decreased, thus prolonging the elimination half-life of the drug. As a result, there were potentially clinically significant increases in exposures to Pristiq [see *Clinical Pharmacology* (12.6) in full prescribing information]. Dosage adjustment (50 mg every other day) is necessary in patients with severe renal impairment or ESRD. The doses should not be escalated in patients with moderate or severe renal impairment or ESRD [see *Dosage and Administration* (2.2) in full prescribing information]. **Seizure**-Cases of seizure have been reported in premarketing clinical studies with Pristiq. Pristiq should be prescribed with caution in patients with a seizure disorder. **Hyponatremia**-Hyponatremia can occur as a result of treatment with SSRIs and SNRIs, including Pristiq. In many cases, this hyponatremia appears to be the result of the syndrome of inappropriate antidiuretic hormone secretion (SIADH). Elderly patients can be at greater risk of developing hyponatremia with SSRIs and SNRIs. Also, patients taking diuretics or who are otherwise volume depleted can be at greater risk [see *Use in Specific Populations* (8.5) and *Clinical Pharmacology* (12.6) in full prescribing information]. Discontinuation of Pristiq should be considered in patients with symptomatic hyponatremia and appropriate medical intervention should be instituted. **Coadministration of Drugs Containing Desvenlafaxine and Venlafaxine**-Desvenlafaxine is the major active metabolite of venlafaxine. Products containing desvenlafaxine and products containing venlafaxine should not be used concomitantly with Pristiq. **Interstitial Lung Disease and Eosinophilic Pneumonia**-Interstitial lung disease and eosinophilic pneumonia associated with venlafaxine (the parent drug of Pristiq) therapy have been rarely reported. The possibility of these adverse events should be considered in patients treated with Pristiq who present with progressive dyspnea, cough, or chest discomfort. Such patients should undergo a prompt medical evaluation, and discontinuation of Pristiq should be considered.

**ADVERSE REACTIONS: Clinical Studies Experience:** The most commonly observed adverse reactions in Pristiq-treated MDD patients in short-term fixed-dose studies (incidence  $\geq 5\%$  and at least twice the rate of placebo in the 50- or 100-mg dose groups) were nausea, dizziness, insomnia, hyperhidrosis, constipation, somnolence, decreased appetite, anxiety, and specific male sexual function disorders. **Adverse reactions reported as reasons for discontinuation of treatment:** The most common adverse reactions leading to discontinuation in at least 2% of the Pristiq-treated patients in the short-term studies, up to 8 weeks, were nausea (4%); dizziness, headache and vomiting (2% each); in the long-term study, up to 9 months, the most common was vomiting (2%). **Common adverse reactions in placebo-controlled MDD studies-** Table 3 in full PI shows the incidence of common adverse reactions that occurred in  $\geq 2\%$  of Pristiq-treated MDD patients at any dose in the 8-week, placebo-controlled, fixed-dose, premarketing clinical studies. In general, the adverse reactions were most frequent in the first week of treatment. **Cardiac disorders:** Palpitations, Tachycardia, Blood pressure increased; **Gastrointestinal disorders:** Nausea, Dry mouth, Diarrhea, Constipation, Vomiting; **General disorders and administration site conditions:** Fatigue, Chills, Feeling jittery, Asthenia; **Metabolism and nutrition disorders:** Decreased appetite, weight decreased; **Nervous system disorders:** Dizziness, Somnolence, Headache, Tremor, Paresthesia, Disturbance in attention; **Psychiatric disorders:** Insomnia, Anxiety, Nervousness, Irritability, Abnormal dreams; **Renal and urinary disorders:** Urinary hesitation; **Respiratory, thoracic, and mediastinal disorders:** Yawning; **Skin and subcutaneous tissue disorders:** Hyperhidrosis, Rash; **Special Senses:** Vision blurred; **Mydriasis, Tinnitus, Dysgeusia; Vascular Disorders:** Hot flush. **Sexual function adverse reactions-** Table 4 shows the incidence of sexual function adverse reactions that occurred in  $\geq 2\%$  of Pristiq-treated MDD patients in any fixed-dose group (8-week, placebo-controlled, fixed and flexible-dose, premarketing clinical studies). **Men Only:** Anorgasmia, Libido decreased, Orgasm abnormal, Ejaculation delayed, Erectile dysfunction, Ejaculation disorder, Ejaculation failure, Sexual dysfunction; **Women Only:** Anorgasmia. **Other adverse reactions observed in premarketing clinical studies:** Other infrequent adverse reactions occurring at an incidence of  $< 2\%$  in MDD patients treated with Pristiq were: **Immune system disorders** - Hypersensitivity. **Investigations** - Liver function test abnormal, blood prolactin increased. **Nervous system disorders** - Convulsion, syncope, extrapyramidal disorder. **Psychiatric disorders** - Depersonalization, hypomania. **Respiratory, thoracic and mediastinal disorders** - Epistaxis. **Vascular disorders** - Orthostatic hypotension. In clinical studies, there were uncommon reports of ischemic cardiac adverse events, including myocardial ischemia, myocardial infarction, and coronary occlusion requiring revascularization; these patients had multiple underlying cardiac risk factors. More patients experienced these events during Pristiq treatment as compared to placebo [see *Warnings and Precautions* (5.7)]. **Discontinuation events**-Adverse events reported in association with abrupt discontinuation, dose reduction or tapering of treatment in MDD clinical studies at a rate of  $\geq 5\%$  include dizziness, nausea, headache, irritability, insomnia, diarrhea, anxiety, abnormal dreams, fatigue, and hyperhidrosis. In general, discontinuation events occurred more frequently with longer duration of therapy [see *Dosage and Administration* (2.4) and *Warnings and Precautions* (5.9) in full prescribing information]. **Laboratory, ECG and vital sign changes observed in MDD clinical studies-** The following changes were observed in placebo-controlled, short-term, premarketing MDD studies with Pristiq. **Lipids**-Elevations in fasting serum total cholesterol, LDL (low density lipoproteins) cholesterol, and triglycerides occurred in the controlled studies. Some of these abnormalities were considered potentially clinically significant [see *Warnings and Precautions* (5.8)]. **Proteinuria**-Proteinuria, greater than or equal to trace, was observed in the fixed-dose controlled studies (see Table 6 in full prescribing information). This proteinuria was not associated with increases in BUN or creatinine and was generally transient. **ECG changes**-Electrocardiograms were obtained from 1,492 Pristiq-treated patients with major depressive disorder and 984 placebo-treated patients in clinical studies lasting up to 8 weeks. No clinically relevant differences were observed between Pristiq-treated and placebo-treated patients for QT, QTc, PR, and QRS intervals. In a thorough QTc study with prospectively determined criteria, desvenlafaxine did not cause QT prolongation. No difference was observed between placebo and desvenlafaxine treatments for the QRS interval. **Vital sign changes**-Table 7 summarizes the changes that were observed in placebo-controlled, short-term, premarketing studies with Pristiq in patients with MDD (doses 50 to 400 mg). Relative to placebo, Pristiq was associated with mean increase of up to 2.1 mm Hg in systolic blood pressure, 2.3 mm Hg in diastolic blood pressure, and 4.1 bpm with supine pulse. At the final on-therapy assessment in the 6-month, double-blind, placebo-controlled phase of a long-term study in patients who had responded to Pristiq during the initial 12-week, open-label phase, there was no statistical difference in mean weight gain between Pristiq- and placebo-treated patients. **DRUG INTERACTIONS: Central Nervous System (CNS)-Active Agents**-The risk of using Pristiq in combination with other CNS-active drugs has not been systematically evaluated. Consequently, caution is advised when Pristiq is taken in combination with other CNS-active drugs [see *Warnings and Precautions* (5.13)]. **Monamine Oxidase Inhibitors (MAOIs)**-Adverse reactions, some of which were serious, have been reported in patients who have recently been discontinued from a monamine oxidase inhibitor (MAOI) and started on antidepressants with pharmacological properties similar to Pristiq (SNRIs or SSRIs), or who have recently had SNRI or SSRI therapy discontinued prior to initiation of an MAOI [see *Contraindications* (4.2)]. **Serotonergic Drugs**-Based on the mechanism of action of Pristiq and the potential for serotonin syndrome, caution is advised when Pristiq is coadministered with other drugs that may affect the serotonergic neurotransmitter systems [see *Warnings and Precautions* (5.2)]. **Drugs that interfere with Hemostasis** (e.g.,

**NSAIDs, Aspirin, and Warfarin**)-Serotonin release by platelets plays an important role in hemostasis. Epidemiological studies of case-control and cohort design have demonstrated an association between use of psychotropic drugs that interfere with serotonin reuptake and the occurrence of upper gastrointestinal bleeding. These studies have also shown that concurrent use of an NSAID or aspirin may potentiate this risk of bleeding. Altered anticoagulant effects, including increased bleeding, have been reported when SSRIs and SNRIs are coadministered with warfarin. Patients receiving warfarin therapy should be carefully monitored when Pristiq is initiated or discontinued. **Ethanol**-A clinical study has shown that desvenlafaxine does not increase the impairment of mental and motor skills caused by ethanol. However, as with all CNS-active drugs, patients should be advised to avoid alcohol consumption while taking Pristiq. **Potential for Other Drugs to Affect Desvenlafaxine-Inhibitors of CYP3A4 (ketoconazole)**-CYP3A4 is a minor pathway for the metabolism of Pristiq. Concomitant use of Pristiq with potent inhibitors of CYP3A4 may result in higher concentrations of Pristiq. **Inhibitors of other CYP enzymes**-Based on *in vitro* data, drugs that inhibit CYP isozymes 1A1, 1A2, 2A6, 2D6, 2C8, 2C9, 2C19, and 2E1 are not expected to have significant impact on the pharmacokinetic profile of Pristiq. **Potential for Desvenlafaxine to Affect Other Drugs**-Drugs metabolized by CYP2D6 (desipramine)-*In vitro* studies showed minimal inhibitory effect of desvenlafaxine on CYP2D6. Clinical studies have shown that desvenlafaxine does not have a clinically relevant effect on CYP2D6 metabolism at the dose of 100 mg daily. Concomitant use of desvenlafaxine with a drug metabolized by CYP2D6 can result in higher concentrations of that drug. **Drugs metabolized by CYP3A4 (midazolam)**-*In vitro*, desvenlafaxine does not inhibit or induce the CYP3A4 isozyme. Concomitant use of Pristiq with a drug metabolized by CYP3A4 can result in lower exposures to that drug. **Drugs metabolized by CYP1A2, 2A6, 2C8, 2C9 and 2C19**-*In vitro*, desvenlafaxine does not inhibit CYP1A2, 2A6, 2C8, 2C9, and 2C19 isozymes and would not be expected to affect the pharmacokinetics of drugs that are metabolized by these CYP isozymes. **P-glycoprotein Transporter**-*In vitro*, desvenlafaxine is not a substrate or an inhibitor for the P-glycoprotein transporter. The pharmacokinetics of Pristiq are unlikely to be affected by drugs that inhibit the P-glycoprotein transporter, and desvenlafaxine is not likely to affect the pharmacokinetics of drugs that are substrates of the P-glycoprotein transporter. **Electroconvulsive Therapy**-There are no clinical data establishing the risks and/or benefits of electroconvulsive therapy combined with Pristiq treatment. **USE IN SPECIFIC POPULATIONS: Pregnancy**-Patients should be advised to notify their physician if they become pregnant or intend to become pregnant during therapy. **Teratogenic effects** - Pregnancy Category C - There are no adequate and well-controlled studies of Pristiq in pregnant women. Therefore, Pristiq should be used during pregnancy only if the potential benefits justify the potential risks. **Non-teratogenic effects**-Neonates exposed to SNRIs (Serotonin and Norepinephrine Reuptake Inhibitors), or SSRIs (Selective Serotonin Reuptake Inhibitors), late in the third trimester have developed complications requiring prolonged hospitalization, respiratory support, and tube feeding. Such complications can arise immediately upon delivery. Reported clinical findings have included respiratory distress, cyanosis, apnea, seizures, temperature instability, feeding difficulty, vomiting, hypoglycemia, hypotonia, hypertonia, hyperreflexia, tremor, jitteriness, irritability, and constant crying. These features are consistent with either a direct toxic effect of SSRIs and SNRIs or, possibly, a drug discontinuation syndrome. It should be noted that, in some cases, the clinical picture is consistent with serotonin syndrome [see *Warnings and Precautions* (5.2)]. When treating a pregnant woman with Pristiq during the third trimester, the physician should carefully consider the potential risks and benefits of treatment [see *Dosage and Administration* (2.2)]. **Labor and Delivery**-The effect of Pristiq on labor and delivery in humans is unknown. Pristiq should be used during labor and delivery only if the potential benefits justify the potential risks. **Nursing Mothers**-Desvenlafaxine (O-desmethylvenlafaxine) is excreted in human milk. Because of the potential for serious adverse reactions in nursing infants from Pristiq, a decision should be made whether or not to discontinue nursing or to discontinue the drug, taking into account the importance of the drug to the mother. Only administer Pristiq to breastfeeding women if the expected benefits outweigh any possible risk. **Pediatric Use**-Safety and effectiveness in the pediatric population have not been established [see *Box Warning and Warnings and Precautions* (5.1)]. Anyone considering the use of Pristiq in a child or adolescent must balance the potential risks with the clinical need. **Geriatric Use**-Of the 3,292 patients in clinical studies with Pristiq, 5% were 65 years of age or older. No overall differences in safety or efficacy were observed between these patients and younger patients, but greater sensitivity of some older individuals cannot be ruled out. For elderly patients, possible reduced renal clearance of desvenlafaxine should be considered when determining dose [see *Dosage and Administration* (2.2) and *Clinical Pharmacology* (12.6) in full prescribing information]. **Renal Impairment**-In subjects with renal impairment the clearance of Pristiq was decreased. In subjects with severe renal impairment (24-hr CrCl  $< 30$  mL/min) and end-stage renal disease, elimination half-lives were significantly prolonged, increasing exposures to Pristiq; therefore, dosage adjustment is recommended in these patients [see *Dosage and Administration* (2.2) and *Clinical Pharmacology* (12.6) in full prescribing information]. **Hepatic Impairment**-The mean  $t_{1/2}$  changed from approximately 10 hours in healthy subjects and subjects with mild hepatic impairment to 13 and 14 hours in moderate and severe hepatic impairment, respectively. No adjustment in starting dosage is necessary for patients with hepatic impairment.

**OVERDOSAGE: Human Experience with Overdosage**-There is limited clinical experience with desvenlafaxine succinate overdose in humans. In premarketing clinical studies, no cases of fatal acute overdose of desvenlafaxine were reported. The adverse reactions reported within 5 days of an overdose  $> 600$  mg that were possibly related to Pristiq included headache, vomiting, agitation, dizziness, nausea, constipation, diarrhea, dry mouth, paresthesia, and tachycardia. Desvenlafaxine (Pristiq) is the major active metabolite of venlafaxine. Overdose experience reported with venlafaxine (the parent drug of Pristiq) is presented below; the identical information can be found in the *Overdosage* section of the venlafaxine package insert. In postmarketing experience, overdose with venlafaxine (the parent drug of Pristiq) has occurred predominantly in combination with alcohol and/or other drugs. The most commonly reported events in overdose include tachycardia, changes in level of consciousness (ranging from somnolence to coma), mydriasis, seizures, and vomiting. Electrocardiogram changes (e.g., prolongation of QT interval, bundle branch block, QRS prolongation), sinus and ventricular tachycardia, bradycardia, hypotension, rhabdomyolysis, vertigo, liver necrosis, serotonin syndrome, and death have been reported. Published retrospective studies report that venlafaxine overdose may be associated with an increased risk of fatal outcomes compared to that observed with SSRI antidepressant products, but lower than that for tricyclic antidepressants. Epidemiological studies have shown that venlafaxine-treated patients have a higher pre-existing burden of suicide risk factors than SSRI-treated patients. The extent to which the finding of an increased risk of fatal outcomes can be attributed to the toxicity of venlafaxine in overdose, as opposed to some characteristic(s) of venlafaxine-treated patients, is not clear. Prescriptions for Pristiq should be written for the smallest quantity of capsules consistent with good patient management, in order to reduce the risk of overdose. **Management of Overdosage**-Treatment should consist of those general measures employed in the management of overdose with any SSRI/SNRI. Ensure an adequate airway, oxygenation, and ventilation. Monitor cardiac rhythm and vital signs. General supportive and symptomatic measures are also recommended. Gastric lavage with a large-bore orogastric tube with appropriate airway protection, if needed, may be indicated if performed soon after ingestion or in symptomatic patients. Activated charcoal should be administered. Induction of emesis is not recommended. Because of the moderate volume of distribution of this drug, forced diuresis, dialysis, hemoperfusion, and exchange transfusion are unlikely to be of benefit. No specific antidotes for desvenlafaxine are known. In managing an overdose, consider the possibility of multiple drug involvement. The physician should consider contacting a poison control center for additional information on the treatment of any overdose. Telephone numbers for certified poison control centers are listed in the Physicians Desk Reference (PDR).

This brief summary is based on Pristiq Prescribing Information W10529C002, revised April 2008.

Wyeth®

© 2009, Wyeth Pharmaceuticals Inc., Philadelphia, PA 19101 243828-01

For the treatment of adults with major depressive disorder

# The start is just the beginning

It's not just about starting your adult patients with MDD on therapy; it's about helping them toward their treatment goals. Patients should be periodically reassessed to determine the need for continued treatment.<sup>1</sup>

## PRISTIQ 50 mg:

- SNRI therapy with efficacy proven in 8-week clinical studies
- One recommended therapeutic dose from the start
- Discontinuation rate due to adverse events comparable to placebo in 8-week clinical studies<sup>1</sup>

 **Pristiq**<sup>®</sup>  
desvenlafaxine 50 mg  
*think beyond start*<sup>™</sup>

## IMPORTANT TREATMENT CONSIDERATIONS

PRISTIQ 50-mg Extended-Release Tablets are indicated for the treatment of major depressive disorder in adults.

### WARNING: SUICIDALITY AND ANTIDEPRESSANT DRUGS

Antidepressants increased the risk compared to placebo of suicidal thinking and behavior (suicidality) in children, adolescents, and young adults in short-term studies of Major Depressive Disorder (MDD) and other psychiatric disorders. Anyone considering the use of PRISTIQ or any other antidepressant in a child, adolescent, or young adult must balance this risk with the clinical need. Short-term studies did not show an increase in the risk of suicidality with antidepressants compared to placebo in adults beyond age 24; there was a reduction in risk with antidepressants compared to placebo in adults aged 65 and older. Depression and certain other psychiatric disorders are themselves associated with increases in the risk of suicide. Patients of all ages who are started on antidepressant therapy should be monitored appropriately and observed closely for clinical worsening, suicidality, or unusual changes in behavior. Families and caregivers should be advised of the need for close observation and communication with the prescriber. PRISTIQ is not approved for use in pediatric patients.

### Contraindications

- PRISTIQ is contraindicated in patients with a known hypersensitivity to PRISTIQ or venlafaxine.
- PRISTIQ must not be used concomitantly with an MAOI or within 14 days of stopping an MAOI. Allow 7 days after stopping PRISTIQ before starting an MAOI.

### Warnings and Precautions

- All patients treated with antidepressants should be monitored appropriately and observed closely for clinical worsening, suicidality, and unusual changes in behavior, especially during the first few months of treatment and when changing the dose. Consider changing the therapeutic regimen, including possibly discontinuing the medication, in patients whose depression is persistently worse or includes symptoms of anxiety, agitation, panic attacks, insomnia, irritability, hostility, aggressiveness, impulsivity, akathisia, hypomania, mania, or suicidality that are severe, abrupt in onset, or were not part of the patient's presenting symptoms. Families and caregivers of patients being treated with antidepressants should be alerted about the need to monitor patients.
- Development of a potentially life-threatening serotonin syndrome may occur with SNRIs and SSRIs, including PRISTIQ, particularly with concomitant use of serotonergic drugs, including triptans, and with drugs that impair the metabolism of serotonin (including MAOIs). If concomitant use is clinically warranted, careful observation of the patient is advised, particularly during treatment initiation and dose increases. Concomitant use of PRISTIQ with serotonin precursors is not recommended.
- Patients receiving PRISTIQ should have regular monitoring of blood pressure since sustained increases in blood pressure were observed in clinical studies. Pre-existing hypertension should be controlled before starting PRISTIQ. Caution should be exercised in treating patients with pre-existing hypertension or other underlying conditions that might be compromised by increases in blood pressure. Cases of elevated blood pressure requiring immediate treatment have been reported. For patients who experience a sustained increase in blood pressure, either dose reduction or discontinuation should be considered.

- SSRIs and SNRIs, including PRISTIQ, may increase the risk of bleeding events. Concomitant use of aspirin, NSAIDs, warfarin, and other anticoagulants may add to this risk.
- Mydriasis has been reported in association with PRISTIQ; therefore, patients with raised intraocular pressure or those at risk of acute narrow-angle glaucoma (angle-closure glaucoma) should be monitored.
- PRISTIQ is not approved for use in bipolar depression. Prior to initiating treatment with an antidepressant, patients should be adequately screened to determine the risk of bipolar disorder.
- As with all antidepressants, PRISTIQ should be used cautiously in patients with a history or family history of mania or hypomania, or with a history of seizure disorder.
- Caution is advised in administering PRISTIQ to patients with cardiovascular, cerebrovascular, or lipid metabolism disorders. Increases in blood pressure and small increases in heart rate were observed in clinical studies with PRISTIQ. PRISTIQ has not been evaluated systematically in patients with a recent history of myocardial infarction, unstable heart disease, uncontrolled hypertension, or cerebrovascular disease.
- Dose-related elevations in fasting serum total cholesterol, LDL (low density lipoprotein) cholesterol, and triglycerides were observed in clinical studies. Measurement of serum lipids should be considered during PRISTIQ treatment.
- On discontinuation, adverse events, some of which may be serious, have been reported with PRISTIQ and other SSRIs and SNRIs. Abrupt discontinuation of PRISTIQ has been associated with the appearance of new symptoms. Patients should be monitored for symptoms when discontinuing treatment. A gradual reduction in dose (by giving 50 mg of PRISTIQ less frequently) rather than abrupt cessation is recommended whenever possible.
- Dosage adjustment (50 mg every other day) is necessary in patients with severe renal impairment or end-stage renal disease (ESRD). The dose should not be escalated in patients with moderate or severe renal impairment or ESRD.
- Products containing desvenlafaxine and products containing venlafaxine should not be used concomitantly with PRISTIQ.
- Hyponatremia may occur as a result of treatment with SSRIs and SNRIs, including PRISTIQ. Discontinuation of PRISTIQ should be considered in patients with symptomatic hyponatremia.
- Interstitial lung disease and eosinophilic pneumonia associated with venlafaxine (the parent drug of PRISTIQ) therapy have been rarely reported.

### Adverse Reactions

- The most commonly observed adverse reactions in patients taking PRISTIQ vs placebo for MDD in short-term fixed-dose premarketing studies (incidence  $\geq 5\%$  and twice the rate of placebo in the 50-mg dose group) were nausea (22% vs 10%), dizziness (13% vs 5%), hyperhidrosis (10% vs 4%), constipation (9% vs 4%), and decreased appetite (5% vs 2%).

Reference: 1. Pristiq<sup>®</sup> (desvenlafaxine) Prescribing Information, Wyeth Pharmaceuticals Inc.

Please see brief summary of Prescribing Information on adjacent pages.

**Pristiq**<sup>®</sup>  
desvenlafaxine  
EXTENDED-RELEASE TABLETS

**Wyeth**<sup>®</sup>

© 2009, Wyeth Pharmaceuticals Inc.  
Philadelphia, PA 19101 243828-01
