# THE AMERICAN JOURNAL OF PSYCHIATRY

---

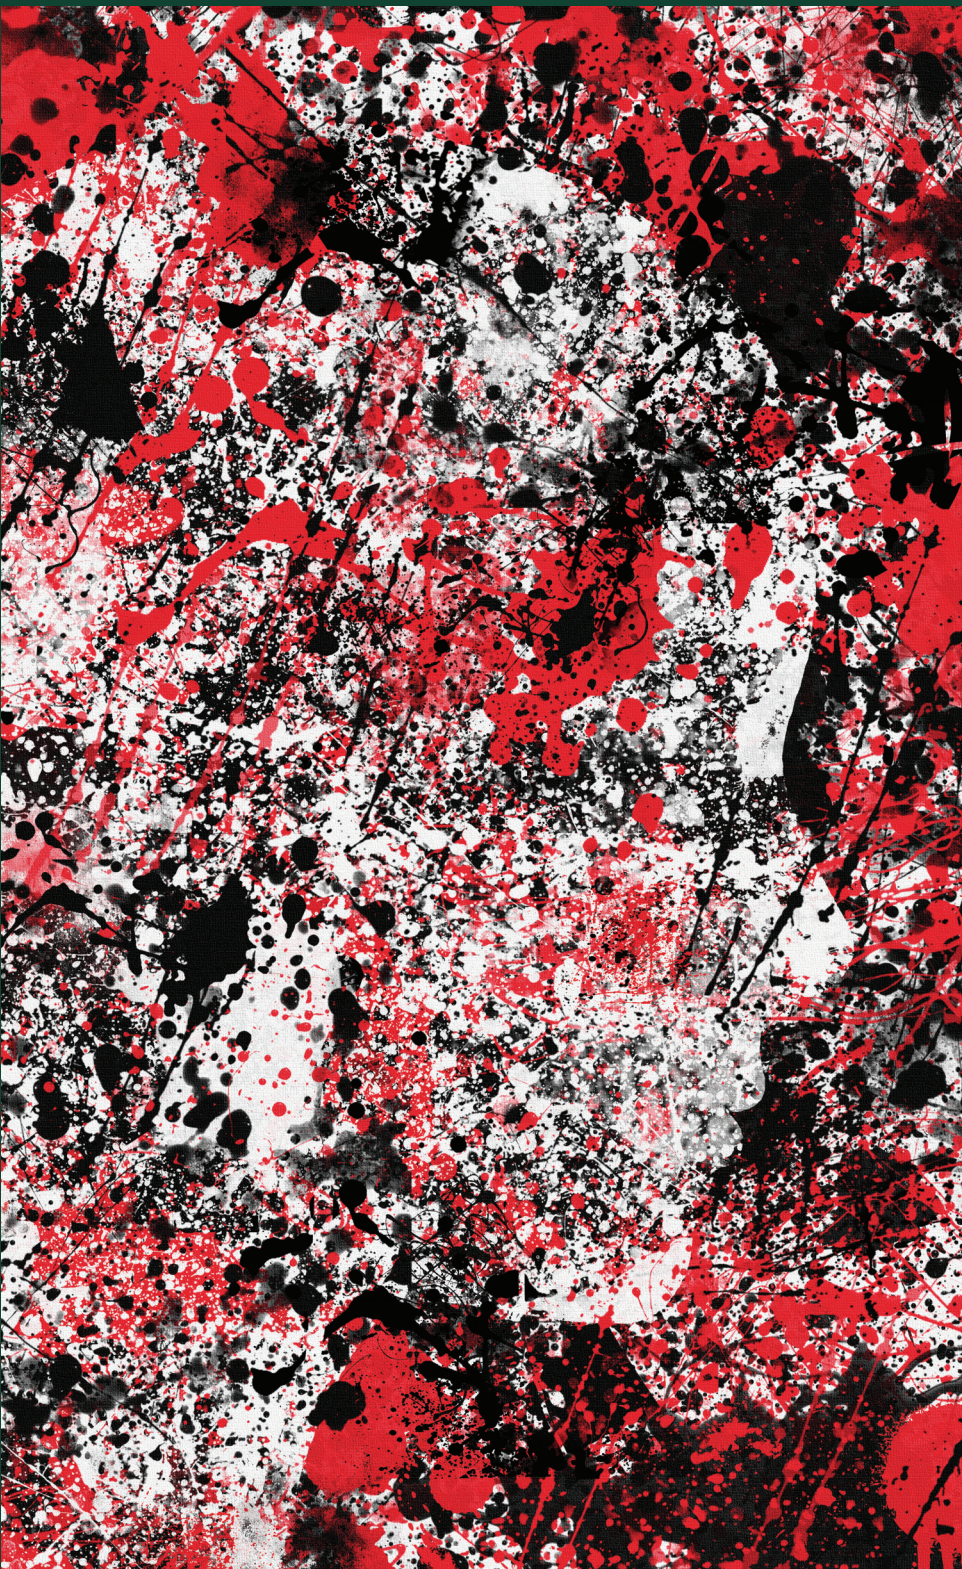

- ◀ **Borderline Personality Disorder**  
Otto F. Kernberg, M.D.  
and Robert Michels, M.D. 505
  
- ◀ **Borderline Personality Disorder  
Comes of Age**  
John M. Oldham, M.D., M.S. 509
  
- ◀ **Insight, Transference  
Interpretation, and Therapeutic  
Change in the Dynamic  
Psychotherapy of Borderline  
Personality Disorder**  
Glen O. Gabbard, M.D.  
and Mardi J. Horowitz, M.D. 517
  
- ◀ **Quieting the Affective Storm of  
Borderline Personality Disorder**  
Marianne Goodman, M.D., et al. 522
  
- ◀ **Borderline Personality  
Disorder: Ontogeny of a  
Diagnosis**  
John G. Gunderson, M.D. 530
  
- Continuing Medical Education 627

May 2009

Volume 166 • Number 5

---

Official Journal of the  
AMERICAN PSYCHIATRIC ASSOCIATION

---

[ajp.psychiatryonline.org](http://ajp.psychiatryonline.org)
