# Read *The American Journal of Psychiatry* Online

Activate your FREE online access—It's as easy as 1, 2, 3!

To begin activation, go to [ajp.psychiatryonline.org](http://ajp.psychiatryonline.org) and click **SUBSCRIBE**

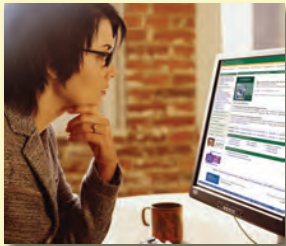

For APA Members and Other Individuals:

1. Click on **ACTIVATE Your Member or Individual (Non-Member) Subscription**
2. Locate your 10-digit Member/Customer Number\* on your journal mailing label above your name. Be sure to enter all 10 digits, including any leading zeros.
3. Enter your number in the box and click **SUBMIT**.

On the next screen, you'll register your subscription and create a username and password that can be used immediately to access your online subscription.

\*If you are an APA Member, in most cases the number on your label will be your Member Number; if it is not, please enter your APA Member Number (with enough leading zeros to create 10 digits) instead of the number on your mailing label.

For Institutions:

1. Click on **ACTIVATE Your Institutional Subscription**.
2. Locate your Customer Number on the journal mailing label above your name. Be sure to enter all 10-digits.
3. Enter your number in the box and click **SUBMIT**. On the next screen, you'll have the opportunity to enter IP addresses for your institution to provide seamless access for your patrons.

Member/Customer Number

AJP3000056866 CAR-RT LOT88 C-015  
John Q. Sample  
Mental Health Professional  
1000 Wilson Blvd STE 1825  
Arlington VA 22209-3924 01654

## Benefits of Online Activation

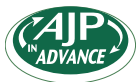

**AJP in Advance**—key research articles posted on the AJP website well in advance of their appearance in print.

**Back issue access to Volume 1, Issue 1**, starting with the *American Journal of Insanity* in 1844. (Available to institutions as a separate one-time purchase.)

**AJP CME**—interactive quizzes that offer *AMA PRA Category 1 Credits*<sup>™</sup> for selected articles from each issue (with paid subscription to the CME Course Program).

**AJP Audio**—MP3-format program summarizing findings from key articles from each issue.

**Residents' Journal**—the gateway to AJP articles and features that have most value to residents in their training.

**Precise and powerful searching** by author, keyword, and/or citation details—within any one journal, across the entire PsychiatryOnline journal collection, or across all HighWire journals.

**PubMed, CrossRef, and Google Scholar links**—from cited references to abstracts and full text; to similar articles; to other articles by the same lead authors.

**eTOCs**—Get advance email alerts with the table of contents from the latest issue.

For more information or if you cannot locate your customer number, please contact APPI Customer Service:  
Call: 1.800.368.5777 or 703.907.7322  
Email: [appi@psych.org](mailto:appi@psych.org)

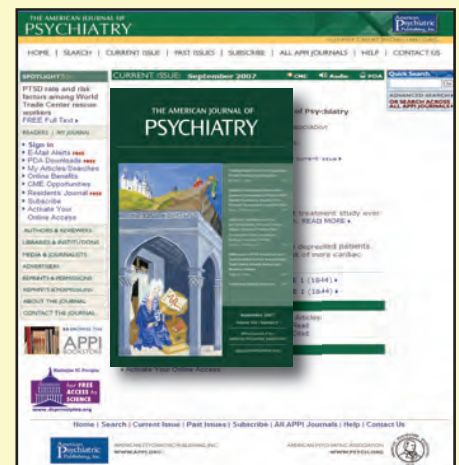

American  
**Psychiatric**  
Publishing, Inc.

The First and Last Word in Psychiatry

AH810

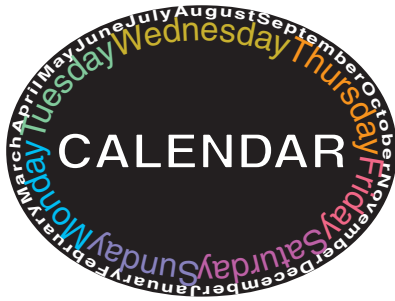

For free listing of your organization's official annual or regional meeting, please send us the following information: sponsor, location, inclusive dates, type and number of continuing education credits (if available), and the name, address, and telephone number of the person or group to contact for more information. In order for an event to appear in our listing, all notices and changes must be received at least 6 months in advance of the meeting and should be addressed to:

Calendar, American Journal of Psychiatry, 1000 Wilson Boulevard, Suite 1825, Arlington, VA 22209-3901, [jblair@psych.org](mailto:jblair@psych.org) (e-mail).

Because of space limitations, only listings of meetings of the greatest interest to Journal readers will be included.

---

## MAY

**May 15–17**, 5th International Conference on Alzheimer's Disease and Related Disorders in the Middle East, Limassol, Cyprus. Contact: Conference Secretariat; 1-773-784-8134 (tel), 1-773-782-6747 (tel), 1-208-575-5453 (fax), [meetings@worldeventsforum.com](mailto:meetings@worldeventsforum.com) (e-mail), [www.worldeventsforum.com/alz.htm](http://www.worldeventsforum.com/alz.htm) (web site).

**May 16–21**, 162nd Annual Meeting of the American Psychiatric Association, San Francisco, CA. Contact: Cathy Nash, APA Annual Meetings Dept., 1000 Wilson Blvd., Ste. 1825, Arlington, VA 22209; (703) 907-7822.

---

## JUNE

**June 16–20**, 2nd Thematic Conference on Legal and Forensic Psychiatry, Madrid, Spain. Contact: World Psychiatric Association, Alfredo Calcedo Barba, [forensicpsychiatry2009@gmail.com](mailto:forensicpsychiatry2009@gmail.com).

---

## AUGUST

**August 27–30**, Canadian Psychiatric Association 59th Annual Meeting, St. Johns, Newfoundland, Canada. Contact: 260-441 MacLaren Street, Ottawa, ON K2P 2H3, Canada; (800) 267-1555 (tel), (613) 234-9857 (fax), [conferene@cpa-apc.org](mailto:conferene@cpa-apc.org) (e-mail), [www.cpa-apc.org](http://www.cpa-apc.org) (web site).

---

## OCTOBER

**October 8–11**, 61st Institute on Psychiatric Services, American Psychiatric Association, Boston, MA. Contact: Jill Gruber, APA Annual Meetings Dept., 1000 Wilson Blvd., Ste. 1825, Arlington, VA 22209; (703) 907-7815.

sociation, New York, NY. Contact: Jill Gruber, APA Annual Meetings Dept., 1000 Wilson Blvd., Ste. 1825, Arlington, VA 22209; (703) 907-7815.

**October 27–November 1**, 56th Annual Meeting of the American Academy of Child and Adolescent Psychiatry, Honolulu, HI. Contact: AACAP, 3615 Wisconsin Avenue, N.W., Washington, DC 20016-3007; (202) 966-7300 (tel), (202) 966-2891 (fax), [meetings@aacap.org](mailto:meetings@aacap.org) (e-mail), [www.aacap.org](http://www.aacap.org) (web site).

---

## NOVEMBER

**November 11–14**, 56th Annual Meeting, Academy of Psychosomatic Medicine, Las Vegas, Nev. Contact: [www.apm.org](http://www.apm.org) (web site).

---

## MARCH 2010

**March 17–20**, 21st Annual Meeting, American Neuropsychiatric Association, Tampa, Fla. Contact: [www.anpaonline.org](http://www.anpaonline.org) (web site).

---

## MAY

**May 22–27**, 163rd Annual Meeting of the American Psychiatric Association, New Orleans, LA. Contact: Cathy Nash, APA Annual Meetings Dept., 1000 Wilson Blvd., Ste. 1825, Arlington, VA 22209; (703) 907-7822.

---

## OCTOBER

**October 14–17**, 62nd Institute on Psychiatric Services, American Psychiatric Association, Boston, MA. Contact: Jill Gruber, APA Annual Meetings Dept., 1000 Wilson Blvd., Ste. 1825, Arlington, VA 22209; (703) 907-7815.

Association, Boston, MA. Contact: Jill Gruber, APA Annual Meetings Dept., 1000 Wilson Blvd., Ste. 1825, Arlington, VA 22209; (703) 907-7815.

**October 26–31**, 57th Annual Meeting of the American Academy of Child and Adolescent Psychiatry, New York, NY. Contact: AACAP, 3615 Wisconsin Avenue, N.W., Washington, DC 20016-3007; (202) 966-7300 (tel), (202) 966-2891 (fax), [meetings@aacap.org](mailto:meetings@aacap.org) (e-mail), [www.aacap.org](http://www.aacap.org) (web site).

---

## MAY 2011

**May 14–19**, 164th Annual Meeting of the American Psychiatric Association, Honolulu, HI. Contact: Cathy Nash, APA Annual Meetings Dept., 1000 Wilson Blvd., Ste. 1825, Arlington, VA 22209; (703) 907-7822.

---

## OCTOBER

**October 18–23**, 58th Annual Meeting of the American Academy of Child and Adolescent Psychiatry, Toronto, Ontario. Contact: AACAP, 3615 Wisconsin Avenue, N.W., Washington, DC 20016-3007; (202) 966-7300 (tel), (202) 966-2891 (fax), [meetings@aacap.org](mailto:meetings@aacap.org) (e-mail), [www.aacap.org](http://www.aacap.org) (web site).

**October 27–30**, 63rd Institute on Psychiatric Services, American Psychiatric Association, San Francisco, CA. Contact: Jill Gruber, APA Annual Meetings Dept., 1000 Wilson Blvd., Ste. 1825, Arlington, VA 22209; (703) 907-7815.

# New Feature for Residents!

## *The American Journal of Psychiatry* Residents' Journal

A FREE electronic publication produced specifically for psychiatry residents

The Residents' Journal contains special links to full text of the articles from the current *American Journal of Psychiatry* and to AJP Audio, a downloadable MP3 file featuring highlights from the issue. In addition, this e-mail bulletin contains two exclusive features:

### Journal Club Kit

A featured article presented with an overview discussing the reasons for its selection, discussion questions, and an editorial by a senior member of the field placing the article into clinical context.

### Educational Article

Case presentation that illustrates a major point in clinical practice or highlights unique treatment approaches.

Plus lively contributions from your fellow residents:

- Instructive cases
- Unique clinical or educational programs
- Perspectives on training and career development
- Discussions arising from journal club discussions

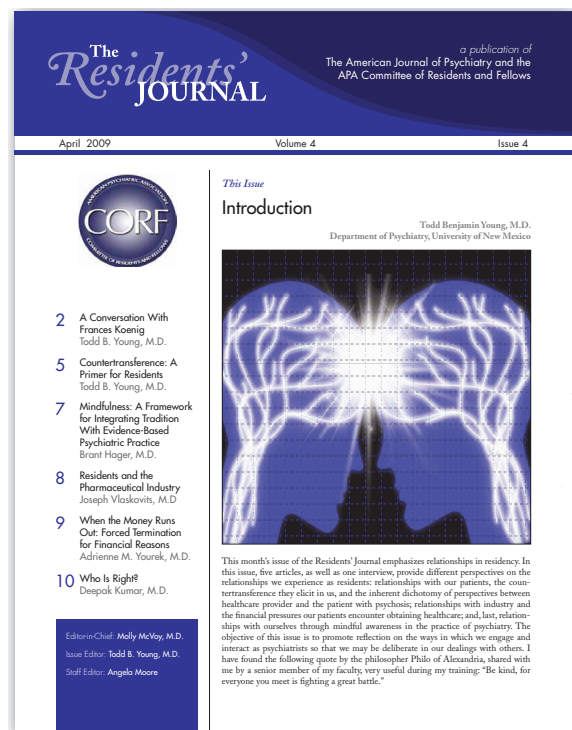

The Residents' Journal is sent free-of-charge to all psychiatry residents. Anyone interested in being included on the distribution list should contact Angela Moore, the Residents' Journal staff editor at [ajp@psych.org](mailto:ajp@psych.org) with "Subscribe to Residents' Journal" in the subject line.

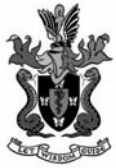

# THE BRITISH JOURNAL OF PSYCHIATRY

April 2009, VOL. 194

- A13 Editorial Board  
A15 Highlights of this issue
- Editorials**
- 293 **Why psychiatry can't afford to be neurophobic**  
E. Bullmore, P. Fletcher and P.B. Jones
- 296 **Prevention of first-episode depression: progress and potential**  
R.G. Robinson and R.E. Jorge
- Special article**
- 298 **Frontotemporal dementia presenting as schizophrenia-like psychosis in young people: clinicopathological series and review of cases**  
D. Velakoulis, M. Walterfang, R. Mocellin, C. Pantelis, and C. McLean
- Review article**
- 306 **Mental health implications of detaining asylum seekers: systematic review**  
K. Robjant, R. Hassan, and C. Katona
- 312 **The Rose and the Key (1871), J. Sheridan LeFanu – psychiatrists in 19th-century fiction**  
Fiona Subotsky
- Papers**
- 313 **Molecular differentiation of schizoaffective disorder from schizophrenia using BDNF haplotypes**  
T. Lencz, R.H. Lipsky, P. DeRosse, K.E. Burdick, J.M. Kane, and A.K. Malhotra
- 319 **Gender differences in the association between childhood abuse and psychosis**  
H. Fisher, C. Morgan, P. Dazzan, T.K. Craig, K. Morgan, G. Hutchinson, P.B. Jones, G.A. Doody, C. Pariante, P. McGuffin, R.M. Murray, J. Leff, and P. Fearon
- 325 **Catatonia – in 100 words**  
Max Fink and Michael A. Taylor
- 326 **International and indigenous diagnoses of mental disorder among Vietnamese living in Vietnam and Australia**  
Z. Steel, D. Silove, N.M. Giao, T.T.B. Phan, T. Chey, A. Whelan, A. Bauman, and R.A. Bryant
- 334 **Treated depression in adolescents: predictors of outcome at 28 weeks**  
P. Wilkinson, B. Dubicka, R. Kelvin, C. Roberts, and I. Goodyer
- 342 **Prednisolone suppression test in depression: prospective study of the role of HPA axis dysfunction in treatment resistance**  
M.F. Juruena, C.M. Pariante, A.S. Papadopoulos, L. Poon, S. Lightman, and A.J. Cleare
- 350 **Migraine in recurrent depression: case-control study**  
Z. Samaan, A. Farmer, N. Craddock, L. Jones, A. Korszun, M. Owen, and P. McGuffin
- 355 **Brain serotonin transporter binding in former users of MDMA ('ecstasy')**  
S. Selvaraj, R. Hoshi, Z. Bhagwagar, N.V. Murthy, R. Hinz, P. Cowen, H.V. Curran, and P. Grasby
- 360 **Mortality and tardive dyskinesia: long-term study using the US National Death Index**  
C.E. Dean and P.D. Thuras
- 364 **Watching zee detectives – psychiatry in the movies**  
Peter Byrne
- 365 **Impact of a mental health teaching programme on adolescents**  
P.B. Naylor, H.A. Cowie, S.J. Walters, L. Talamelli, and J. Dawkins
- Short reports**
- 371 **Anandamide elevation in cerebrospinal fluid in initial prodromal states of psychosis**  
D. Koethe, A. Giuffrida, D. Schreiber, M. Hellmich, F. Schultze-Lutter, S. Ruhrmann, J. Klosterkötter, D. Piomelli, and F.M. Leweke
- 373 **Using the Stroop task to investigate the neural correlates of symptom change in schizophrenia**  
L. Krabbendam, O. O'Daly, L.A. Morley, J. van Os, R.M. Murray, and S.S. Shergill
- 375 **Intrauterine testosterone exposure and risk for disordered eating**  
J.H. Baker, P. Lichtenstein, and K.S. Kendler
- Columns**
- 377 **Correspondence**
- 378 **Correction**
- 379 **Book reviews**
- 384 **Contents of *Advances in Psychiatric Treatment***
- 385 **Contents of *The American Journal of Psychiatry***
- 386 **From the Editor's desk**
